1

2

3

4 Genome-scale metabolic model of the diatom *Thalassiosira pseudonana* highlights  
5 the importance of nitrogen and sulfur metabolism in redox balance

6

7 Helena M. van Tol<sup>1,2\*</sup>, E. Virginia Armbrust<sup>1\*</sup>

8

9

10

11

12

13 <sup>1</sup> School of Oceanography, University of Washington, Seattle, WA, USA

14 <sup>2</sup> Bioscience and Biotechnology Division, Lawrence Livermore National Laboratory, Livermore,

15 CA, USA

16

17

18

19

20

21

22 \* Corresponding authors

23 E-mails: [vantol2@llnl.gov](mailto:vantol2@llnl.gov) (HV), [armbrust@uw.edu](mailto:armbrust@uw.edu) (EA)

## 24 **Abstract**

25           Diatoms are unicellular photosynthetic algae known to secrete organic matter that fuels  
26 secondary production in the ocean, though our knowledge of how their physiology impacts the  
27 character of dissolved organic matter remains limited. Like all photosynthetic organisms, their  
28 use of light for energy and reducing power creates the challenge of avoiding cellular damage. To  
29 better understand the interplay between redox balance and organic matter secretion, we  
30 reconstructed a genome-scale metabolic model of *Thalassiosira pseudonana* strain CCMP 1335,  
31 a model for diatom molecular biology and physiology, with a 60-year history of studies. The  
32 model simulates the metabolic activities of 1,432 genes via a network of 2,792 metabolites  
33 produced through 6,079 reactions distributed across six subcellular compartments. Growth was  
34 simulated under different steady-state light conditions ( $5\text{-}200 \mu\text{mol photons m}^{-2} \text{s}^{-1}$ ) and in a  
35 batch culture progressing from exponential growth to nitrate-limitation and nitrogen-starvation.  
36 We used the model to examine the dissipation of reductants generated through light-dependent  
37 processes and found that when available, nitrate assimilation is an important means of dissipating  
38 reductants in the plastid; under nitrate-limiting conditions, sulfate assimilation plays a similar  
39 role. The use of either nitrate or sulfate uptake to balance redox reactions leads to the secretion of  
40 distinct organic nitrogen and sulfur compounds. Such compounds can be accessed by bacteria in  
41 the surface ocean. The model of the diatom *Thalassiosira pseudonana* provides a mechanistic  
42 explanation for the production of ecologically and climatologically relevant compounds that may  
43 serve as the basis for intricate, cross-kingdom microbial networks. Diatom metabolism has an  
44 important influence on global biogeochemistry; metabolic models of marine microorganisms link  
45 genes to ecosystems and may be key to integrating molecular data with models of ocean  
46 biogeochemistry.

47

## 48 **Introduction**

49           Diatoms are unicellular photosynthetic eukaryotes derived from a secondary  
50 endosymbiotic event when a heterotrophic eukaryote engulfed a red algal cell and acquired a  
51 plastid [1]. They appeared in the fossil record ~180 million years ago [2] and are distinguished  
52 from other photosynthetic organisms by their distinct combination of metabolic pathways,  
53 including the presence of a complete urea cycle, and their ability to precipitate silica to form  
54 their cell wall and to synthesize chitin. It is a special challenge of systems biology to understand  
55 how this unique combination of interlocking pathways has allowed diatoms to thrive in the  
56 dynamic conditions of oceanic ecosystems.

57           A central need for photosynthetic organisms is to balance redox reactions, particularly  
58 when nutrient availability limits growth (Figure 1). Light energy drives linear electron flow from  
59 water split at photosystem II (PSII) to PSI, generating reducing power (NADPH) and a proton  
60 gradient across the thylakoid membrane that drives ATP synthase. An ATP/NADPH ratio of 1.5  
61 is required for CO<sub>2</sub> reduction by the Calvin-Benson-Bassham cycle [3]. Linear electron flow  
62 alone has an ATP/NADPH ratio of ~1.28 [4]. If not somehow mitigated, the resulting imbalance  
63 would cause the plastid to become over-reduced, damage the thylakoid membranes and cause  
64 photoinhibition [5]. In plants, NADPH-consuming pathways and alternative electron pathways  
65 that produce ATP without generating NADPH help balance redox reactions in the chloroplast  
66 [6,7]. Alternative electron fluxes include cyclic electron flow (CEF) around PSI, and water-to-  
67 water cycles where electrons from water oxidation at PSII are re-routed to an oxidation pathway  
68 – the Mehler reaction, chlororespiration, or photorespiration [8]. Diatoms are instead thought to  
69 preferentially regulate the ATP/NADPH ratio via energetic coupling between plastids and

70 mitochondria [9], by which reduced metabolites are shuttled from the plastid to fuel ATP  
71 generation in the mitochondria.  
72  
73 **Figure 1** Diagram illustrating the principle reactions involved in generating ATP and balancing  
74 the ATP/NADPH ratio in diatom plastids. Black shapes: enzymatic complexes, gray bars:  
75 plastidial or mitochondrial membranes, dashed lines: grouping of plastidial and mitochondrial  
76 reactions, green: reactions that produce NAD(P)H equivalents, red: reactions that consume  
77 NAD(P)H equivalents, blue: ATP producing and consuming reactions. Abbreviations: L-  
78 glutamate (glu\_\_L), L-glutamine (gln\_\_L), 2-phosphoglycolate (2pglyc), glycolate (glyclt),  
79 glyoxylate (glx), glycine (gly), L-serine (ser\_\_L), L-malate (mal\_\_L), fumarate (fum), succinate  
80 (succ), dehydroascorbate (dhascb), L-ascorbate (ascb\_\_L), oxidized glutathione disulfide  
81 (gthox), reduced glutathione (gthrd), reduced ferredoxin (Fd), reduced thioredoxin (Trx),  
82 plastoquinone (PQ), plastoquinol (PQH<sub>2</sub>), NADH ubiquinone oxidoreductase (NADHOR), ATP  
83 synthase (ATPS). Number symbols indicate reaction references in the text including: cyclic  
84 electron flow (CEF, ❶), nitrate assimilation (❷), sulfate assimilation (❸), ribulose-1,5-  
85 bisphosphate oxygenase (RUBISO, ❹), the Mehler reaction (❺), energetic coupling between the  
86 plastid and the mitochondria (❻), plastid terminal oxidase (PTOX, ❼), alternative oxidase  
87 (AOX, ❸), cytochrome *c* oxidase (CYOO, ❹).

88

89 Nitrate and sulfate assimilation are also involved in dissipating reducing equivalents in  
90 plastids as many enzymes involved in these processes are plastid-targeted (Figure 1). Nitrite  
91 reductase consumes 3 NADPH to reduce nitrite to ammonia, and the GS-GOGAT cycle  
92 (glutamine synthase – glutamine oxoglutarate aminotransferase) utilizes 2 reduced ferredoxin

93 and 1 ATP to assimilate ammonia. During sulfate assimilation, sulfate is converted to APS  
94 (adenosine-5'-phosphosulfate) and either APS reductase or PAPS (3'-phosphoadenosine-5'-  
95 phosphosulfate) reductase utilizes a reduced thioredoxin to produce sulfite, consuming the  
96 equivalent of 2 ATP and 1 NADPH. Sulfite reductase consumes 6 reduced ferredoxin to produce  
97 sulfide for cysteine. A sulfurtransferase consumes 1 NADPH to produce L-cysteate from PAPS.  
98 Reductants are not consumed by the synthesis of sulfolipids from sulfite. Phosphate is  
99 assimilated by ATP synthase in the plastid and in the mitochondria. There is no evidence that  
100 diatoms can reduce phosphate to phosphite or phosphonate [10].

101       Metabolite production, secretion, or storage can also help balance redox reactions or  
102 dissipate energy [11], particularly when biomass production is otherwise inhibited.

103 Phytoplankton adjust their biomass composition in response to nutrient limitation [12,13],  
104 elevated CO<sub>2</sub> [14], low irradiance [15], and interactions with bacteria [16]. Diatoms also secrete  
105 more dissolved organic carbon in conditions of high light intensity [17], more dissolved organic  
106 nitrogen at suboptimal temperatures [18], and more exopolysaccharides (EPS) during nutrient  
107 limitation [19,20].

108       Here we created a mechanistic model of metabolism for the diatom *Thalassiosira*  
109 *pseudonana* CCMP 1335 to evaluate the interplay between redox balance, altered biomass  
110 composition, and organic matter secretion. We distilled all available physiological and molecular  
111 data from the literature to construct the metabolic network, to create biomass objective functions,  
112 to calculate ATP maintenance costs, and to add appropriate constraints to major fluxes. The  
113 model *iTps1432* includes the first mechanistic model of electron transfer by fucoxanthin  
114 chlorophyll *a/c* binding proteins (FCPs); it is also the first metabolic model to include silicate  
115 frustule formation and a hypothetical pathway for the biosynthesis of 2,3-dihydroxypropane-1-

116 sulfonate (DHPS), a novel diatom osmolyte [21]. To simulate growth under a range of different  
117 light and nutrient conditions, we used Flux Balance Analysis (FBA) to calculate fluxes through  
118 the metabolic network given a set of constraints and an objective function to optimize [22]. We  
119 used biomass composition and photosynthetic production rate measurements from chemostats  
120 maintained under three different light levels [23] to construct light-dependent biomass objective  
121 function, constrain growth, photosynthesis, and respiration to calculate ATP maintenance costs  
122 and simulate metabolic fluxes under a range of irradiances. We found that cyclic electron flow  
123 could be an important sink for electrons at the light levels tested ( $5\text{-}200 \mu\text{mol photons m}^{-2} \text{s}^{-1}$ ),  
124 even though it is known to be a relatively minor component of alternative electron flow at higher  
125 light levels [9]. Nitrate reduction is also an important electron sink under these conditions. Next,  
126 we simulated growth in a nitrate-limited batch culture with dynamic Flux Balance Analysis  
127 (dFBA) using experimental biomass composition and PSII flux measurements from Liefer, *et al.*  
128 [24,25]. We found that sulfate reduction takes over the role of nitrate under these conditions.  
129 When biomass production is inhibited due to nutrient limitation, redox imbalances can be  
130 corrected by the excretion of organic carbon and sulfur compounds.

131

## 132 **Materials and methods**

### 133 **Network reconstruction and curation**

134 A genome-scale metabolic model of *Thalassiosira pseudonana* CCMP 1335 was  
135 generated using *i*LB1027\_lipid (the model of *Phaeodactylum tricornutum* CCAP 1055/1, [26])  
136 as a starting point, based on similarities between the two diatoms. The *T. pseudonana* nuclear  
137 proteome was acquired from a dataset produced by Gruber, *et al.* [27], in which previous open  
138 reading frames (ORFs) were improved by ensuring that each gene starts with 'ATG', encodes an

139 uninterrupted reading frame that ends in a stop codon, is less than 10 kb in length, and has EST  
140 support. The ORFs used in a *T. pseudonana* network reconstruction for BioCyc (including  
141 plastid and mitochondrial proteomes) were retrieved as well [28]; these proteins were re-  
142 annotated in 2012 using the JGI annotation pipeline for eukaryotes [29]. The *P. tricornutum*  
143 chromosomal proteome was downloaded from EnsemblProtists (ASM15095v2), the plastid and  
144 mitochondrial proteomes were downloaded from NCBI (acc no.: NC\_008588.1, HQ840789.1).  
145 The authors of *iLB1027\_lipid* provided a gene ID conversion table that we used to update the  
146 gene IDs in the published model. OrthoMCL [30] was used to identify gene orthologs of *P.*  
147 *tricornutum* and the two sets of *T. pseudonana* ORFs. A network of *T. pseudonana* reactions was  
148 generated by retaining reactions in *iLB1027\_lipid* that contained gene orthologs from *T.*  
149 *pseudonana* and deleting reactions with no gene ortholog, except for spontaneous reactions.  
150 Protein localization predictions were performed on both *T. pseudonana* ORF sets (see  
151 Subcellular Protein Localization, below). BiGG IDs [31] were used for reactions and metabolites  
152 in the *T. pseudonana* network, and these were assigned to one of six different compartments:  
153 cytosol (‘c’), mitochondria (‘m’), peroxisome (‘x’), plastid (‘h’), thylakoid lumen (‘u’), or  
154 endoplasmic reticulum (‘r’).

155 We implemented the guidelines from an established genome-scale reconstruction  
156 protocol [32] to refine the *T. pseudonana* model. All genes from Gruber, *et al.* [27] with  
157 orthologs in the reconstruction, all genes assigned to a reaction in BioCyc [28], and all *T.*  
158 *pseudonana* genes without an ortholog in *P. tricornutum* were annotated with InterProScan [33]  
159 and those annotations were used to verify gene-protein-reaction associations, and to detect  
160 missing genes, reactions, and pathways in the model. We used KEGG [34] and BioCyc [28]  
161 databases to aid in model curation and to make comparisons between organisms. The literature

162 on *T. pseudonana* was examined for experimental evidence for the existence of different  
163 reactions and for protein localization data (see references and notes in S1 Data Set). When  
164 experimental protein localization data was available, it superseded the subcellular localization  
165 prediction. For each reaction, mass and charge balance were verified and links to external  
166 databases were added for each reaction and metabolite. TransportDB 2.0 [35] was used to  
167 generate a list of transporter gene annotations; transport reactions were added to the model in  
168 cases where the database included associated substrates with the annotation. Extracellular  
169 transport reactions were also added in cases where there is experimental evidence that a substrate  
170 is excreted or utilized by *T. pseudonana* or other diatoms (see references and notes in S1 Data  
171 Set).

172         Dead-end metabolites are metabolites present only in blocked reactions; blocked  
173 reactions cannot carry flux due to reactions missing in the network and dead-end metabolites  
174 cannot be produced by the model. These reactions were identified with the flux analysis module  
175 in COBRApy and the gapfilling module was used to identify gaps in the network [36]. Gaps  
176 were filled if a gene for the missing reaction could be identified, if there is physiological  
177 evidence that the reaction exists, if the majority of the pathway was otherwise present in the  
178 model, or if the reaction was required to produce biomass. In *T. pseudonana*, we first checked  
179 whether the reaction was present in another compartment and if there was any evidence that the  
180 subcellular localization prediction was too stringent (e.g., a low confidence prediction may be  
181 more likely based on the localization of other reactions in the pathway), if there is the possibility  
182 of dual-targeting, or if a different gene with the correct localization for the reaction could be  
183 identified. Occasionally, the JGI ORFs (rather than the ORFs from the Gruber proteome [27])  
184 provided the missing gene for a reaction, or a more likely subcellular localization prediction. If



185 there was no evidence that a protein in the model was incorrectly targeted, then transport  
186 reactions between compartments were added to connect the network. To identify and remove  
187 erroneous energy-generating cycles (EGC), we followed the method proposed by Fritzemeier, *et*  
188 *al.* [37], by using the GlobalFit algorithm [38] to suggest the minimum number of changes  
189 required to remove an EGC. The algorithm found that the reaction transporting water between  
190 the cytosol and the mitochondria ( $\text{H2O}_{t\_m}: \text{h2o}_c \rightleftharpoons \text{h2o}_{m'}$ ) and the ITP-apyrase reaction  
191 ( $\text{ITPA}_c: \text{h}_c + \text{idp}_c + \text{pi}_c \rightarrow \text{h2o}_c + \text{itp}_c$ ) created energy-generating cycles. EGCs were  
192 removed by setting the lower bound of  $\text{H2O}_{t\_m}$  to zero and by setting the upper bound of  
193  $\text{ITPA}_c$  to zero.

194 Broddrick, *et al.* [39] published a list of twenty-nine modifications to the *P. tricornutum*  
195 model in 2019. We evaluated whether these modifications should also apply to *iTps1432* and  
196 adapted our model accordingly (S3 Data Set). *iTps1432* is available in SBML format as S1-S3  
197 Files and has been deposited in the BioModels database (acc no.: MODEL2010230001-3).

198

### 199 **Subcellular protein localization**

200 The protein localization pipeline developed by Levering, *et al.* [26] was updated for the  
201 *T. pseudonana* analysis. For plastid targeting predictions, TargetP [40] was replaced with  
202 ASAFind [27], a plastid proteome prediction tool developed for diatoms and other algae with  
203 plastids derived from a secondary endosymbiosis. All *T. pseudonana* proteins were used as input  
204 for SignalP 4.1 [41], TargetP 1.1 [40], HECTAR 1.3 [42], Mitoprot II 1.101 [43], ASAFind 1.1.7  
205 [27], predictNLS 1.3 [44], and scanPrositate [45]. PredictNLS, a tool for predicting nucleus  
206 targeted proteins, was run in batch mode using a script that re-implements predictNLS 1.3 in  
207 Python ([https://github.com/peterjc/pico\\_galaxy/tree/master/tools/predictnls](https://github.com/peterjc/pico_galaxy/tree/master/tools/predictnls)). ScanPrositate was run

208 to search for two peroxisomal targeting signals “[SAC]-[KRH]-[LM]>” and “S-S-L>” [46] and  
209 the PROSITE pattern PS00342 describing microbody C-terminal targeting signals, as well as the  
210 endoplasmic reticulum (ER) targeting signal “[KD]-[DE]-E-L>” [40,47] and the PROSITE  
211 pattern PS00014 describing other endoplasmic reticulum targeting sequences. All other programs  
212 were run with default settings. ER-targeted proteins were defined as ‘Not plastid, SignalP  
213 positive’ or ‘Plastid, low confidence’ by ASAFind and contained an ER-targeting signal  
214 identified by scanProsite. Plastid-targeted proteins include those identified by ASAFind as  
215 ‘Plastid, high confidence’ or ‘Plastid, low confidence’ with no recognized ER targeting signal.  
216 Mitochondria targeted proteins are SignalP negative and predictNLS negative and match one of  
217 the following criteria: (A) have a Mitoprot II score > 0.9, (B) have a Mitoprot II score > 0.8 and  
218 are mitochondria targeted according to HECTAR or have a mitochondrial targeting peptide  
219 according to TargetP, or (C) are predicted to be mitochondria targeted by HECTAR and have a  
220 mitochondrial targeting peptide according to TargetP. Peroxisome targeted proteins are SignalP  
221 negative, predictNLS negative, not mitochondria targeted, and contain a peroxisome targeting  
222 signal according to scanProsite. Proteins in the plastid and mitochondrial genomes were assigned  
223 to reactions in the plastid and mitochondria, respectively. All remaining proteins were assigned  
224 to the cytosol. A total of 408 sequences from the optimized gene catalog could not be run  
225 through this subcellular localization pipeline despite curation by Gruber, *et al.* [27] because they  
226 have internal stop codons or were either too long or too short for some of the programs.

227

## 228 **Mechanistic model of light-harvesting**

229 Using the *Synechococcus elongatus* model iJB785 [48] as a guideline, stoichiometric  
230 reactions were generated to represent light harvesting in *T. pseudonana*. The pigment weight and

231 composition [49,50] of cells acclimated to each light-level were used in combination with the  
232 weight-specific absorption spectra for each pigment [51,52] to calculate the relative absorption  
233 of each pigment within 20 nm bins in the photosynthetically active radiation range (PAR range;  
234 400-700 nm). Excitation energy transfer reactions were generated to account for energy loss in  
235 the transfer of excitation energy from different pigments in the fucoxanthin-chlorophyll *a/c*  
236 binding proteins (FCPs) to chlorophyll *a* in the reaction centers. Photon absorption was  
237 constrained for each wavelength using the absorption spectrum of *T. pseudonana* cells  
238 acclimated to different light levels [53–55] and the light intensity spectrum of a cool white  
239 fluorescent bulb according to the methodology in Broddrick, *et al.* [48]. We also extended the  
240 PSI and PSII reactions to include charge separation and recombination, as in *iJB785*.  
241 Photodamage of the D1 subunit was included as a component of the PSII reaction [48,56], and  
242 the metabolic cost of D1 repair was included as part of a non-growth associated ATP  
243 maintenance reaction as ATP-cost of phosphorylation and activation of the FtsH protease [57]  
244 and as ATP- and GTP-costs of biosynthesizing a D1 peptide. See S3 Data Set for calculations  
245 and references.

246

## 247 **Flux Balance Analysis**

248 Flux balance analysis (FBA) simulates the flow of metabolites through a network of  
249 reactions using the mass balance equation,

$$\frac{dx}{dt} = S \cdot v = 0$$

250 where the change in metabolite concentration ( $dx$ ) over time ( $dt$ ) is equal to the stoichiometric  
251 matrix ( $S$ ) describing a reaction network times a vector of fluxes ( $v$ ), given that

$$LB \leq v \leq UB$$

252 Intracellular metabolites are assumed to be at steady state, which allows  $v$  to be solved while  
253 maximizing an objective function within lower and upper bounds ( $LB$ ,  $UB$ ).

254 We used parsimonious Flux Balance Analysis (pFBA) to generate single solutions for  
255 each simulation. pFBA optimizes the model objective and then minimizes the total sum of flux to  
256 obtain a single solution. The second objective imitates a possible cellular objective of  
257 minimizing protein biosynthesis. The default GLPK solver in COBRApy [36] was used to  
258 optimize all FBA problems.

259

## 260 **Simulation of steady-state light limitation**

261 pFBA was used with the solver tolerance set to  $1e-8$  to simulate growth of *i*Tps1432 in  
262 three chemostats maintained at three different light levels (5, 60, 200  $\mu\text{mol photons m}^{-2} \text{s}^{-1}$ ) using  
263 photosynthetic production measurements from Fisher & Halsey [23] as constraints. The delivery  
264 rate of each nutrient was calculated based on the nutrient concentration in the media reservoir  
265 (0.25 mM  $\text{NO}_3$ , 0.050 mM  $\text{PO}_4$ , 0.106 mM  $\text{Si}(\text{OH})_4$ , 28.8 mM  $\text{SO}_4$ ), the chemostat cell  
266 concentration, the gram dry weight per cell calculated from biomass composition, and the  
267 chemostat dilution rate. Cultures were continuously bubbled to avoid carbon limitation; we  
268 assumed the ambient  $\text{CO}_2$  levels to be 390 ppm  $\text{pCO}_2$  and calculated the resulting concentrations  
269 of  $\text{CO}_2$  and  $\text{HCO}_3$  in the media [56]. Michaelis-Menten parameters were calculated from the  
270 literature on *T. pseudonana* for  $\text{CO}_2$  and  $\text{HCO}_3$  [58]. The PSII reaction was constrained by fitting  
271 the Platt equation [59] (where  $P_s$  and  $\alpha$  are parameters of the hyperbolic tangent)

$$GPP = P_s \cdot (1 - e^{-\alpha I/P_s})$$

272 to each gross photosynthesis (*GPP*) curve generated by Fisher and Halsey ([23], data provided  
273 by K. Halsey) and calculating the 95% confidence interval of gross photosynthesis at each light  
274 level.

275 Photon absorption flux (PFA) was constrained for each 20 nm in the PAR spectral range  
276 using the method published in Broddrick, *et al.* [48],

$$PFA = LB_{\lambda_{20}} = -1 \cdot r_{\lambda_{20}} \cdot I \cdot a_{\lambda_{20}}$$

$$UB_{\lambda_{20}} = 0.9999 \cdot PFA$$

277 , where the term  $r_{\lambda_{20}}$  is the fraction of the light source's photon flux at a particular wavelength  
278 integrated within a 20 nm bin,  $I$  is the light intensity ( $\mu\text{mol photons m}^{-2} \text{s}^{-1}$ ), and  $a_{\lambda_{20}}$  is the  
279 absorption of light at that wavelength ( $\text{m}^2 \text{gDW}^{-1}$ ) [53–55]. The linear relationship between  
280 irradiance and D1 protein damage in *T. pseudonana* [56] was used to calculate the number of  
281 inactivation events per photon at each light level. The quantum efficiency values measured by  
282 Fisher & Halsey [23] were used to convert the number of inactivation events per photon to  
283 events per oxygen molecule evolved at PSII (S3 Data Set).

284 For these simulations, sink reactions for chrysolaminarin and glyceraldehyde-3-  
285 phosphate were added to the model to simulate the respiration of a transient carbon pool.  
286 Utilization of these pools was calculated as the difference between gross and net carbon  
287 production [23]. Measurements of dissolved organic carbon were used to constrain a symbolic  
288 expression representing the sum of organic carbon secretion. Light dependent respiration and  
289 mitochondrial maintenance respiration were calculated by Fisher & Halsey for each chemostat  
290 [23]. Light dependent respiration is defined as the difference between  $^{18}\text{O}_2$  signals in the light  
291 and the dark and includes all light-driven respiration reactions (the reduction of oxygen to  
292 water). We constrained the sum of all respiration reactions with a symbolic expression in which

293 the lower bound is equal to the measured light dependent respiration values. Mitochondrial  
294 maintenance respiration is defined as the difference between gross carbon production and net  
295 oxygen production (converted to C units) and includes all organic carbon driven respiration  
296 reactions. We constrained the sum of all CO<sub>2</sub> producing dehydrogenase reactions in the  
297 mitochondrial TCA cycle with a symbolic expression in which the lower and upper bounds are  
298 equal to the 95% confidence intervals of calculated mitochondrial maintenance respiration  
299 values. Jupyter notebook of this analysis can be viewed at [https://github.com/hmvantol/diatom-](https://github.com/hmvantol/diatom-FBA-notebook)  
300 [FBA-notebook](#).

301

### 302 **Simulation of N-starvation**

303 A dynamic FBA simulation was set up with the solver tolerance set to 1e-8 to simulate  
304 the progression in a batch culture of *T. pseudonana* from mid-exponential under NO<sub>3</sub>-limitation  
305 to mid-stationary phase under N-starvation using biomass composition and PSII photochemistry  
306 measurements from Liefer *et al.* [24,25]. Prior to the start of the experiment, cells were  
307 maintained at 85 μmol photons m<sup>-2</sup> s<sup>-1</sup> over a 12h : 12h light : dark cycle at 18°C in filtered  
308 seawater amended with half the concentration of all f/2 nutrients except for NO<sub>3</sub>, which was  
309 reduced by ~15 fold to 60 μM. At mid-exponential phase, the cells were diluted into fresh media  
310 with no added NO<sub>3</sub> [24,25] and measurements were taken 0, 1, 3, 7, and 10 days after the  
311 dilution to “N-free” media, corresponding to mid-exponential, late-exponential 1, late-  
312 exponential 2, early stationary, and mid-stationary growth phases, as defined in Liefer *et al.* [24].  
313 Nutrient concentrations in the seawater used for the media were not presented. We assumed a  
314 background seawater nutrient concentration of 20 μM NO<sub>3</sub>, 0 μM Si(OH)<sub>4</sub>, and 1.86 μM PO<sub>4</sub>.  
315 This assumption fit well with most nutrient measurements made 1 day after transfer to the new

316 media and with estimates of nutrient concentrations in surface seawater at Cape Tormentine  
317 (Canada) from the World Ocean Atlas (~28  $\mu\text{M}$   $\text{NO}_3$ , ~47  $\mu\text{M}$   $\text{Si}(\text{OH})_4$ , ~2  $\mu\text{M}$   $\text{PO}_4$ ).

318 To simulate the ten-day experiment, the growth period was divided into eighty 3-hour  
319 intervals. Steady-state was assumed for each time interval and pFBA was used to solve for the  
320 growth rate and reaction flux distributions every 3 hours. Units were converted from mmol to  
321  $\mu\text{mol}$  prior to the pFBA step to avoid numerical precision issues associated with small fluxes.  
322 Each time point of the simulation involved four major steps: (1) calculate the biomass objective  
323 function, (2) calculate the uptake rates for each metabolite or nutrient and set photosynthetic  
324 constraints, (3) solve the pFBA problem, (4) update biomass composition and the environment.

325 The biomass objective function (*bof*) used at for each time interval was determined by  
326 calculating the relative difference between the simulated biomass composition at the current time  
327 point ( $t_1$ ) and the next biomass composition measurement ( $t_m$ ) provided by J. Liefer.

$$bio_i(t_m) = f \cdot bio_i(t_1)' \cdot c(t_2)$$

$$\Delta bio_i = bio_i(t_m) - bio_i(t_1)$$

$$bof(t_1) = \frac{\Delta bio_i}{\sum \Delta bio}$$

328 , where each measured biomass component  $i$  is translated from pg/cell ( $bio_i(t_m)'$ ) into g/L  
329 ( $bio_i(t_m)$ ) using cell abundance measurements ( $c(t_2)$ ), and typically  $f = 1$ . During the dark  
330 period, pigment biosynthesis was not included in the biomass objective function since  $T$ .  
331 *pseudonana* lacks a light-independent protochlorophyllide oxidoreductase [60]. Chrysolaminarin  
332 and triacylglycerides were also excluded from the dark period biomass objective function  
333 because these biomass components are known to be consumed at night [61]. Production of these  
334 compounds was increased during the light period by setting  $f$  to the fold-change values measured  
335 by Jallet, *et al.* in *P. tricornutum* grown across a 12 : 12-h light : dark cycle [61]. During time

336 points where the all  $\Delta bio_i$  components are  $< 0$ , the objective function was switched to the ATP  
337 maintenance reaction (ATPM). At each time point, the upper bound of ATPM was re-calculated  
338 for changes in mg chl *a*/gDW using the  $r_{NGAM}$  equation [62]. Individual pigment components  
339 (total chlorophyll, chlorophyll *a*, and total carotenoid) were also measured over the course of the  
340 experiment [25]. Data from the literature shows that the metabolites making up bulk biomass  
341 components shift in relative abundance over the course of N-starvation and during growth in  
342 batch culture. These were similarly tracked and used to as targets to construct new biosynthesis  
343 reactions for each time point. Protein [63] and free amino acid [64] composition measurements  
344 from nitrogen-replete and nitrogen-starvation conditions were used to calculate biomass targets  
345 for each growth phase; nitrogen-replete composition was applied as a target for mid-exponential  
346 and late exponential phase 1, while nitrogen-starved composition was applied as a target to late  
347 exponential phase 2, early and mid-stationary phases. Membrane lipid [65] and triacylglyceride  
348 [66] composition was measured during exponential, transition, and stationary phases in nitrogen-  
349 limited conditions. We used these measurements to calculate biomass targets for each growth  
350 phase: exponential composition was used as a target for mid-exponential and late exponential  
351 phase 1; transition phase composition was used as a target for late exponential phase 2; and  
352 stationary phase composition was used as a target for early and mid-stationary phase. See S4  
353 Data Set for all calculations and references.

354       Using the method described by Chiu *et al.* [67] and published by Noecker *et al.* [68], we  
355 determined the uptake limit for each metabolite *j* at each time point *t*, such that the lower bound  
356 of each exchange reaction is equal to either the flux predicted by the Michaelis-Menten equation  
357 or the concentration of each metabolite  $x_j$  per gram dry weight (*gDW*) biomass ( $bio(t)$ ) per time  
358 period  $\Delta t$ , whichever is closer to zero.



$$LB_j(t) = - \min \left( \frac{V_{max} \cdot x_j}{k_m + x_j}, \frac{x_j}{bio(t) \cdot \Delta t} \right)$$

359 Nutrient uptake rates were calculated using Michaelis-Menten parameters from the literature on  
360 *T. pseudonana* for CO<sub>2</sub>, HCO<sub>3</sub> [58], NO<sub>3</sub> [69], NH<sub>4</sub> [70], and PO<sub>4</sub> [71] (S3 Data Set). The  $V_{max}$   
361 was set to 0.2 and  $K_m$  was set to 0.05 for all other uptake reactions, with the exception of H<sub>2</sub>O  
362 and H<sup>+</sup> which were assumed to diffuse freely and  $V_{max}$  was set to 1000. The biomass-dependent  
363 lower bound assumes that *iTps1432* exists in a well-mixed environment where it can sense  
364 nutrient-availability and adjust its uptake rate accordingly [67].

365 PSII flux was calculated from fast repetition rate fluorometry (FRRf) parameters and  
366 culture data (electron transfer rate from PSII, PSII reaction centers per chlorophyll *a*) measured  
367 on days 0, 1, 3, 7, and 10 of the experiment (S3 Data Set, data provided by J. Liefer, [24]). The  
368 bounds of the PSII reaction were set as the 95% confidence interval of error propagated from the  
369 different measurements. To constrain the relative rate of CO<sub>2</sub> assimilation to O<sub>2</sub> production at  
370 each time point, we calculated the range of potential photosynthetic quotients ( $Q$ ) by balancing  
371 the equation for the oxidation of new biomass to NO<sub>3</sub> or NH<sub>4</sub> with the chempy package [72].  
372 Oxygen utilization and inorganic carbon evolution was not constrained during the dark period.  
373 After each time point, the concentration of O<sub>2</sub>, HCO<sub>3</sub>, and CO<sub>2</sub> was re-equilibrated with the  
374 atmosphere so that concentrations remained constant (well-mixed). We included a constraint for  
375 photorespiration where the oxygenase flux of ribulose-1,5-bisphosphate carboxylase/oxygenase  
376 (RuBisCO) ranges from 0.001 – 0.025 the carboxylase flux.

377 For each time point, constraints were converted from mmol mg chl  $a^{-1} h^{-1}$  to mmol gDW<sup>-1</sup>  
378  $h^{-1}$  using simulated chlorophyll *a* and biomass concentration (mg chl *a* L<sup>-1</sup>/gDW L<sup>-1</sup>) ratios.  
379 Photon absorption flux was constrained for each time point as before, assuming a light  
380 absorption spectrum for cells acclimated to medium light [54] and the light intensity spectrum of

381 a cool white fluorescent bulb (S3 Data Set). A new set of photon absorption (PHOA) reactions  
382 were constructed for each 20 nm wavelength at each time point using the simulated pigment  
383 composition.

384 We allowed for the mobilization of the biomass components chlorophyll *a*, chitin,  
385 polyphosphate, chrysolaminarin, protein amino acids, free amino acids, RNA, and  
386 triacylglycerides by including sink reactions for each of these components. The availability of  
387 each component was calculated as follows if  $\Delta bio_j$  is  $< 0$ .

$$\Delta bio_j = bio_j(t_m) - bio_j(t_1)$$

$$LB_j(t) = \frac{\Delta bio_j \cdot \frac{1000}{Mr_j}}{bio(t) \cdot \Delta t}$$

388 The degradation pathway for chlorophyll *a* is not characterized in diatoms, but chlorophyll *a*  
389 degradation was required to approximate the mg chl *a* gDW<sup>-1</sup> factor. A demand reaction for  
390 chlorophyll *a* was included in the simulation and its lower bound was set to  $-1 * \Delta bio_j$ .

391 We adapted the method described by Chiu *et al.* [67] to calculate changes in biomass  
392 composition and the concentration of metabolites or nutrients over time. To calculate biomass  
393 composition, we calculated biomass concentration  $bio(t_2)$  for the next time interval  $\Delta t$  using the  
394 exponential growth equation,

$$bio(t_2) = bio(t_1) \cdot e^{\mu \Delta t}$$

395 , where  $\mu$  is biomass demand or  $v_{DM\_biomass\_c}$ . Next we calculated the fraction of new biomass  
396 attributed to each component using the biomass objective function. To calculate the  
397 concentration of each metabolite  $x_j$  in the next time interval  $\Delta t$ ,

$$x_j(t_2) = x_j(t_1) + \frac{v_j}{\mu} [bio(t_1)(e^{\mu \Delta t} - 1)]$$

398 , where  $v_j$  is the flux of each metabolite, and  $bio(t_1)$  is the biomass density or sum of all  
399 components at the current time point. Scripts for this simulation can be obtained from  
400 <https://github.com/hmvantol/diatom-dFBA>.

401

## 402 **Results**

### 403 **Reconstruction of the *Thalassiosira pseudonana* metabolic model**

404 A genome-scale metabolic model of *T. pseudonana* CCMP 1335 (*iTps1432*) was  
405 generated using as a framework the *Phaeodactylum tricornutum* (CCAP 1055/1) models  
406 *iLB1027\_lipid* [26] and *iLB1034* [39]. Our model is distinct from a smaller, recently generated  
407 model of *T. pseudonana* (*iThaps987*) designed to explore production of industrially useful  
408 compounds [73]. Differences between *iLB1027\_lipid* and *iLB1034* and their relevance to  
409 *iTps1432* are listed in S3 Data Set. *iLB1027\_lipid* has more reactions than *iLB1034* due to the  
410 inclusion of detailed lipid metabolism. Additional elements incorporated into the *T. pseudonana*  
411 *iTps1432* model include changes in the subcellular localization of reactions based on protein  
412 targeting sequences, improvements in modeled light absorption, and the inclusion of known  
413 metabolic differences between the diatoms. Several blocked reactions were resolved in  
414 *iTps1432*, and the number of dead-end metabolites in the network was reduced when compared  
415 to the *P. tricornutum* models. The *T. pseudonana* model contains 6,073 reactions that represent a  
416 network of 2,789 metabolites and 1,432 genes, approximately 10-12% of the *T. pseudonana*  
417 genome (Table S1).

418 The *iTps1432* model contains reactions localized to six compartments representing the  
419 cytosol, mitochondria, plastid, thylakoid lumen, peroxisome, and the extracellular environment.  
420 As with the *P. tricornutum* model, our prediction pipeline did not localize any metabolic

421 reactions to the endoplasmic reticulum, although other proteins were localized there. We  
422 evaluated the accuracy of our protein localization prediction pipeline by comparing our  
423 predictions to proteomics data from mitochondria and plastid fractions isolated from *T.*  
424 *pseudonana* [74]. Because the resulting fractions were not pure, we used peptide counts to  
425 determine if a protein was enriched in the mitochondrial or plastid fraction or in the cell lysate. A  
426 protein was considered enriched if it made up a greater proportion of peptides in one fraction  
427 versus the others. Using this criterion, 200 proteins were enriched in the mitochondria, 190  
428 proteins in the plastid, and 564 proteins in the cytosol or some other organelle. Overall, 46.5% of  
429 proteins enriched in the mitochondria and 57.4% of proteins enriched in the plastid were  
430 accurately localized by our prediction pipeline (Figure S1a, S1b). About 70% of the 563 proteins  
431 that were enriched outside of the plastid and mitochondria were assigned to other compartments  
432 by our pipeline (Figure S1c); one protein was predicted to be localized in the endoplasmic  
433 reticulum and seven were predicted to be localized in the peroxisome, suggesting that most  
434 proteins enriched in the cell lysate were probably from the cytosol. Genes encoding 258 of the  
435 proteins detected by Schober, *et al.* were present in the model prior to model curation based on  
436 the literature and a little over half of the proteins (146 out of 258) were accurately localized by  
437 the subcellular localization prediction pipeline. After curation, 269 of the proteins detected by  
438 Schober, *et al.* were present in the model (Figure S1).

439 Two major metabolic differences distinguish the two diatom species. First, *T.*  
440 *pseudonana* has an absolute requirement for vitamin B<sub>12</sub> as it possesses only the B<sub>12</sub>-dependent  
441 methionine synthase gene METH [75]. Adenosylcobalamin, methylcobalamin, and  
442 aquacobalamin were included in the biomass reaction as estimated millimole proportions of 1-  
443 gram dry weight ([76], S2 Data Set), and the cofactors were included in the B<sub>12</sub>-dependent

444 reactions. Second, *T. pseudonana* produces chitin [77]; *iTps1432* was modified to include chitin  
445 biosynthesis and degradation pathways.

446 An orthoMCL comparison [30] of homologous genes between *T. pseudonana* and *P.*  
447 *tricornutum* guided additional modifications to *iTps1432*. These analyses confirmed that *T.*  
448 *pseudonana* lacks the enzymes guanine deaminase, tryptophanase, ATP citrate synthase, and  $\beta$ -  
449 carbonic anhydrase [78]. The citrate synthase reaction in *iTps1432* was modified to deprotonate  
450 water rather than phosphorylate ADP, and a cytoplasmic carbonic anhydrase was added to the  
451 model [79]. The analysis also detected a few other differences between *P. tricornutum* and *T.*  
452 *pseudonana*. Reactions present only in *P. tricornutum* were eliminated from *iTps1432*; these  
453 include the isomerization of xylose to xylulose, transamination of 4-aminobutyrate, lysis of O-  
454 acetyl-L-homoserine to L-homocysteine and acetate, L-tryptophan deamination, agmatine  
455 hydrolysis, formamide hydrolysis, and guanine deamination. Reactions present only in *T.*  
456 *pseudonana* include chitin synthesis and hydrolysis, and cleavage of pyruvate into acetyl-CoA  
457 and formate.

458 We also extended the *iTps1432* model to include synthesis and respiration of the  
459 carbohydrate storage molecule chrysolaminarin, synthesis and hydrolysis of polyphosphate,  
460 exopolysaccharide biosynthesis, silicic acid condensation to a silica frustule, and pathways for  
461 the biosynthesis and respiration of 2,3-dihydroxypropane-1-sulfonate (DHPS) [21,80]. Lipid  
462 metabolism was re-configured in *iTps1432* to reflect known differences in lipid composition  
463 [65,66]. We included transport reactions for those amino acids known to be excreted at high  
464 concentrations [81]. If genes encoding putative transporters for amino acids were identified, then  
465 additional transport reactions for chemically similar amino acids were added, with the  
466 assumption that these amino acids could use the same transporter. We included transporters for

467 the following amino acids: L-glutamate, L-aspartate, L-isoleucine, L-leucine, L-valine, L-  
468 asparagine, L-glutamine, L-alanine, L-histidine, L-serine, L-threonine, glycine, and L-proline.  
469 Additional transport reactions for biotin, D-lactate, cyanocobalamin, aquacobalamin, DMSP,  
470 DHPS, glycine betaine, N-acetyltaurine, formamide, formate, uracil, acetate, choline, xanthine,  
471 ATP, AMP, triphosphate, and UDP-N-acetyl-alpha-D-glucosamine, were added based on  
472 information from the literature, gene annotations, and information from other algal models  
473 [48,82].

474 An important addition to *iTps1432* was inclusion of a mechanistic model of photon  
475 absorption and electron transfer by fucoxanthin chlorophyll *a/c* binding proteins (FCPs). We  
476 included reactions that describe energy transfer efficiency from excited pigments to chlorophyll  
477 *a* in the photosystems, and pigment de-excitation reactions to dissipate excess energy as heat or  
478 fluorescence (see S3 Data Set). PSI and PSII reactions were modified to include charge  
479 separation and recombination reactions. Photodamage of the D1 subunit was included as a  
480 component of the PSII reaction [48,56], and the metabolic cost of D1 repair was included as part  
481 of the non-growth ATP maintenance reaction to calculate the ATP-cost of phosphorylation and  
482 activation of the FtsH protease [57] and the ATP- and GTP-costs of biosynthesizing a D1 peptide  
483 (S3 Data Set).

484

#### 485 **Development of biomass objective functions**

486 A critical step in creating genome-scale metabolic models is development of accurate  
487 biomass production reactions in which precursor metabolites are converted into the cellular  
488 components that comprise the millimolar contribution to 1 g dry weight (gDW) of cell mass  
489 under specific growth conditions [32]. In *iTps1432*, the biomass reactions generate the DNA,

490 RNA, protein, free amino acids, pigments, carbohydrates, lipids (phospholipids, sulfolipids,  
491 galactolipids, glycerolipids), triacylglycerides, chitin, chrysolaminarin, osmolytes, a silica  
492 frustule, polyphosphate, and a soluble pool of vitamins and cofactors that together define the  
493 total biomass of *T. pseudonana* under a particular environmental condition. Biomass reactions  
494 were developed for *T. pseudonana* cells acclimated to three different light levels (5, 60, 200  
495  $\mu\text{mol photons m}^{-2} \text{s}^{-1}$ ). Bulk biomass composition (carbohydrates, protein, total dry weight) and  
496 chlorophyll *a* concentration was measured in cells grown in chemostats maintained at 18°C  
497 under 5, 60 and 200  $\mu\text{mol photons m}^{-2} \text{s}^{-1}$  [23]. Pigment composition was derived from cells  
498 grown in a photobioreactor maintained at 18°C at 30  $\mu\text{mol photons m}^{-2} \text{s}^{-1}$  [49] and from  
499 exponentially growing cells maintained at 18°C at 83 and 237  $\mu\text{mol photons m}^{-2} \text{s}^{-1}$  [50]. The  
500 remaining biomass components were calculated from the literature, typically from exponentially  
501 growing cells, at temperatures ranging from 15-21°C (optimal growth temperature is 21°C);  
502 DNA nucleotide composition was calculated from the genome sequence data. A simplified  
503 siliceous frustule formation reaction was added to the model. The number of condensation  
504 reactions per Si atom was derived from NMR data on the degree of silica  
505 hydroxylation/condensation in *T. pseudonana* [83] and was used to calculate how much water  
506 should be released per gram of frustule formed. The weight of the frustule was calculated based  
507 on the expected degree of hydroxylation in the frustule and on either a linear relationship  
508 between growth rate and Si/C under light-limiting conditions (5, 60  $\mu\text{mol photons m}^{-2} \text{s}^{-1}$ ) or a  
509 power law relationship under N-limiting conditions (200  $\mu\text{mol photons m}^{-2} \text{s}^{-1}$ ) [84]. Calculations  
510 and references are provided in S2 Data Set.

511         The biomass composition also impacts the modeled photon absorption rate. Photon  
512 absorption integrated over the Photosynthetically Active Radiation (PAR, 400-700 nm) spectrum

513 in 20 nm units was calculated from whole cell absorption spectra for cells acclimated to 25, 40-  
514 60, and 250  $\mu\text{mol photons m}^{-2} \text{s}^{-1}$  [53–55], as well as weight-specific absorption spectra [51,52]  
515 and pigment composition (S3 Data Set).

516 Development of these biomass objective functions yielded information about the  
517 composition of *T. pseudonana* under different conditions and thus potential growth and  
518 acclimation strategies. The resulting total cell dry weights (scaled to the radius of each circle in  
519 Figure 2) is inversely related to light intensity (22.4, 16.6, 17.8 pg/cell for 5, 60, 200  $\mu\text{mol}$   
520  $\text{photons m}^{-2} \text{s}^{-1}$ , respectively) Similarly, the silica frustule was the greatest component of  
521 biomass at the lowest light intensity (5.2 pg/cell vs 1.6 and 0.7 pg/cell, Figure 2), likely a  
522 consequence of the slower, light-limited divisions rates combined with non-saturable silicic acid  
523 uptake kinetics in *T. pseudonana* [85]. Protein contribution to biomass was inversely correlated  
524 with light intensity, with the least amount of protein at the highest light levels. In contrast, total  
525 carbohydrates increased with light intensity and represented the largest component at 200  $\mu\text{mol}$   
526  $\text{photons m}^{-2} \text{s}^{-1}$  ([23], Figure 2). Pigments per cell were greatest at 5  $\mu\text{mol photons m}^{-2} \text{s}^{-1}$ ,  
527 resulting in an increased rate of photon absorption compared to the higher light levels.  
528 Photoprotective pigments ( $\beta$ -carotene, diadinoxanthin, diatoxanthin) were most abundant at 200  
529  $\mu\text{mol photons m}^{-2} \text{s}^{-1}$  ([49,50], Figure 2).

530

531 **Figure 2** Biomass composition and detailed pigment composition of *Thalassiosira pseudonana*  
532 acclimated to three different light levels (5, 60, 200  $\mu\text{mol photons m}^{-2} \text{s}^{-1}$ ). The radius of each  
533 circle is scaled to the total cellular dry weight. To demonstrate the effect of pigment composition  
534 (highlighted in green) on photon absorption at different wavelengths, photon absorption was  
535 plotted for each acclimated cell during illumination at 100  $\mu\text{mol photons m}^{-2} \text{s}^{-1}$  under a cool



536 white fluorescent bulb. The contribution of each pigment is integrated over each 20 nm of the  
537 light spectrum.

538

### 539 **ATP maintenance cost calculation**

540 Cellular energy requirements, in the form of ATP utilization, impact biomass production  
541 and metabolite excretion in metabolic models. ATP maintenance costs were calculated for the  
542 three light levels (5, 60, 200  $\mu\text{mol photons m}^{-2} \text{ s}^{-1}$ ) using our biomass objective functions and  
543 production measurements (provided by K. Halsey) from chemostats maintained at the same light  
544 levels [23]. Growth-associated ATP utilization represents the energy not accounted for in  
545 biopolymer formation reactions while non-growth associated ATP utilization accounts for energy  
546 utilization in the absence of growth. Growth-associated ATP maintenance calculations can be  
547 impacted by photodamage due to high light intensities [86]. In the chemostat studies [23], the  
548 maximum photochemical yield of PSII (Fv/Fm) remained constant (0.56-0.58), across the three  
549 light levels indicating a lack of photodamage. We therefore constrained biomass production  
550 using chemostat dilution rates and performed Flux Balance Analysis (FBA) for each light level  
551 by maximizing the ATP hydrolysis reaction. A linear relationship ( $R^2 = 0.94$ ) between ATP  
552 utilization and growth rate allowed us to estimate the non-growth associated maintenance ( $r_{NGAM}$   
553  $= -27 \pm 52$  SE) costs as the y-intercept and the growth associated maintenance ( $r_{GAM} = 3809 \pm$   
554  $1221$  SE) costs as the slope (S2 Figure). The small sample sizes resulted in large error bars (S2  
555 Figure). Rather than constrain the ATP maintenance reaction with these bounds, we iteratively  
556 searched for individual  $r_{GAM}$  values for each biomass objective function using the measured  
557 growth rate and calculated theoretical upper bounds for  $r_{NGAM}$ .

558 The theoretical upper bound of non-growth associated maintenance ( $r_{NGAM}$ ) was  
559 calculated for each chemostat using the compensation light level ( $I_c$ ), which is the light intensity  
560 at which photosynthesis is equal to respiration and the growth rate is zero [62].

$$r_{NGAM} = I_c a_{chl a} r \phi_m e$$

561 where  $a_{chl a}$  is the chlorophyll  $a$  specific absorption coefficient ( $m^2 \text{ mg Chl } a^{-1}$ ),  $r$  is the ratio of  
562 chlorophyll  $a$  to gram dry weight per cell ( $\text{mg Chl } a^{-1} \text{ gDW}^{-1}$ ),  $\phi_m$  is the quantum efficiency of  
563 photosynthesis ( $\text{mol O}_2 \text{ mol photon}^{-1}$ ), and  $e$  is the amount of ATP generated per oxygen. The  
564 parameter  $I_k$  was estimated by fitting Chalker equation 1 [87] (where DR stands for dark  
565 respiration)

$$NPP = P_s \cdot \tanh(I/I_k) + DR$$

566 to each net photosynthesis ( $NPP$ ) curve generated by Fisher and Halsey ([23], data provided by  
567 K. Halsey).  $I_k$  was then used to calculate the compensation light level ( $I_c$ ) for each chemostat  
568 (Chalker equation 4).

$$I_c = I_k \tanh^{-1}(-DR/P_s)$$

569 The  $r$  and  $\phi_m$  parameters were obtained from Fisher and Halsey; the  $a_{chl a}$  parameter was  
570 calculated from Finkel [53], Stramski *et al.* [54], and Sobrino *et al.* [55] (S3 Data Set). The  
571 resulting non-growth and growth associated maintenance costs are 1.6, 2.2, and 3.7  $\text{mmol gDW}^{-1}$   
572  $\text{h}^{-1}$  and 2698, 2217, and 3669  $\text{mmol ATP gDW}^{-1}$  for cells acclimated to 5, 60, and 200  $\mu\text{mol}$   
573  $\text{photons m}^{-2} \text{ s}^{-1}$ , respectively.

574

## 575 Cyclic electron flow

576 Cyclic electron flow (CEF) and respiration both consume the reduced ferredoxin and  
577 downstream equivalents generated via linear electron flow (LEF), driving ATP generation and

578 increased flux through PSII (Figure 1) and thus balance redox. Additionally, CEF helps  
579 generates a proton gradient across the thylakoid membrane through cytochrome *b<sub>6</sub>/f*.  
580 Constraining these reactions can improve the accuracy of flux predictions in *iTps1432*. Bailleul  
581 *et al.* [9] proposed that CEF is less than 5% of maximal total electron flow in diatoms. Maximal  
582 total electron flow occurs when light is saturating and increased flux of electrons cannot occur.  
583 To constrain CEF in *iTps1432* we simulated the Bailleul *et al.* [9] light response experiment with  
584 FBA using the biomass equation we developed and absorption spectrum acquired for cells  
585 acclimated to medium light intensity (60  $\mu\text{mol photons m}^{-2} \text{s}^{-1}$ ; their cultures were acclimated to  
586 70  $\mu\text{mol photons m}^{-2} \text{s}^{-1}$ ). The maximal total electron flow through a cell acclimated to medium  
587 light was estimated by setting the level of light exposure to  $\sim 2000 \mu\text{mol photons m}^{-2} \text{s}^{-1}$   
588 (saturating). PSII, oxygen exchange, and bicarbonate exchange reactions were constrained by the  
589 95% confidence intervals of gross and net photosynthesis and carbon uptake, respectively,  
590 measured for cells acclimated to 60  $\mu\text{mol photons m}^{-2} \text{s}^{-1}$  and exposed to 1952  $\mu\text{mol photons m}^{-2}$   
591  $\text{s}^{-1}$  [23]. The rate of D1 damage for the PSII reaction was calculated based on the number of  
592 inactivation events per O<sub>2</sub> molecule evolved [56], using a quantum efficiency ( $\phi_m$ ) of 0.056 mol  
593 O<sub>2</sub> per photon [23] (S3 Data Set). Nutrient uptake rates were calculated using the Michaelis-  
594 Menten equation with  $f/2$  nutrient concentrations. The upper bound of CEF was constrained with  
595 the following symbolic expression where CEF is set to 5% of total electron flow,

$$2 \cdot CEF = 0.05 \cdot (PSICS + PSIICS - 2 \cdot CBFC2 + 2 \cdot CEF)$$

596 Linear electron flow (LEF) is the sum of electron flux through PSI and PSII (represented by  
597 charge separation reactions: PSICS, PSIICS) minus the linear flow from PSII through to PSI  
598 (represented by cytochrome *b<sub>6</sub>/f*: CBFC2). The pFBA simulation calculated 0.38  $\text{mmol gDW}^{-1} \text{h}^{-1}$   
599 <sup>1</sup> as an upper bound of CEF and we used this value in subsequent simulations. CEF is relatively

600 insensitive to short-term changes in light intensity and appears similar in a variety of diatom  
601 species [9]. At the highest light intensities ( $\sim 2000 \mu\text{mol photons m}^{-2} \text{ s}^{-1}$ ), CEF is an insignificant  
602 fractional component of total electron flow (TEF) in *T. pseudonana*; at the lower light intensity  
603 of  $\sim 100 \mu\text{mol photon m}^{-2} \text{ s}^{-1}$ , CEF corresponds to about half of TEF (see Extended Data Figure  
604 9b in [9]). How CEF differs in cells acclimated to different light levels or cells in different  
605 growth phases is not yet known.

606

### 607 **Effect of light limitation**

608         The allocation of photosynthetic energy to biomass production and respiration was  
609 quantified using pFBA with *i*Tps1432 at three different light levels [23], constrained by  
610 chemostat production data (provided by K. Halsey), the calculated ATP maintenance costs, and  
611 CEF, given the light-dependent differences in biomass composition (Figure 2). The pathways  
612 contributing to the dissipation of reducing equivalents generated by light energy include: CEF;  
613 respiration (ribulose-1,5-bisphosphate oxygenase, glycolate oxidase, plastid terminal oxidase, the  
614 Mehler reaction, alternative oxidase, cytochrome *c* oxidase); nitrogen assimilation ( $\text{NO}_3$   
615 reductase,  $\text{NO}_2$  reductase, glutamate synthesis); sulfate assimilation (PAPS reductase, APS  
616 reductase, 2-aminoacrylate sulfotransferase,  $\text{SO}_3$  reductase); carbon assimilation and  
617 biosynthesis of reduced metabolites (Figure 1). Some pathways also dissipate the electrons  
618 generated by transient pools of organic carbon respired to  $\text{CO}_2$ . For example, rapidly dividing  
619 cells preferentially use storage polysaccharides such as chrysolaminarin, while slowly growing  
620 populations dominated by cells in G1 phase preferentially use newly formed glyceraldehyde-3-  
621 phosphate (G3P) [88]. Additional sink reactions for chrysolaminarin and G3P were included to  
622 simulate respiration of these transient organic carbon pools. From the chemostat dilution rates we

623 calculated the fraction of cells dividing per hour (*T. pseudonana* cell division is not  
624 synchronized). The sink reactions were constrained (proportionally to the fraction of cells  
625 dividing per hour) with the differences between gross and net carbon production (the carbon  
626 catabolism measurements) for each chemostat [23].

627       Biomass production and cyclic electron flow are the largest electron sinks (Figure 3a).  
628 G3P production by the Calvin cycle is a sink for electrons across all three light levels, with the  
629 lowest amount produced at the highest light intensity due to increased supply of G3P that is not  
630 entirely consumed by mitochondrial maintenance respiration. The biosynthesis of complex  
631 macromolecules, or further reduction of G3P, is another source of NADPH consumption, and  
632 becomes increasingly important at higher light intensities. Nitrate and sulfate reduction also  
633 consume reducing equivalents. At 5  $\mu\text{mol photons m}^{-2} \text{ s}^{-1}$ , nitrate reduction is a proportionally  
634 more important component of biomass production than at other light levels because of the high  
635 protein content of cells acclimated to low light (10.5 pg/cell vs. 4.3 and 3.3 pg/cell, Figure 2).  
636 Respiration is also more important at low light levels. Mitochondrial maintenance respiration  
637 was used to constrain respiration of organic carbon via the TCA cycle, and as a result  
638 cytochrome *c* oxidase is a constant proportion of TEF (Figure 3a). PFBA predicts that the Mehler  
639 reaction was the largest respiratory flux at 5 and 200  $\mu\text{mol photons m}^{-2} \text{ s}^{-1}$ , while at 60  $\mu\text{mol}$   
640  $\text{photons m}^{-2} \text{ s}^{-1}$  cytochrome *c* oxidase was the largest and there was also some respiration by  
641 plastid terminal oxidase (Figure 3a). To achieve a single solution, pFBA minimizes the absolute  
642 sum of fluxes with the objective of minimizing enzyme utilization. Given that this objective may  
643 not be relevant to photosynthetic organisms dealing with redox balance, we explored additional  
644 respiratory constraints in the simulation.

645

646 **Figure 3** Parsimonious Flux Balance Analysis (pFBA) predictions (in  $\text{mmol e}^- \text{gDW}^{-1} \text{h}^{-1}$ ) for the  
647 contribution of different reactions to the dissipation of reductants generated by photosynthesis  
648 and organic carbon utilization in *iTps1432* across three chemostats maintained at 5, 60, and 200  
649  $\mu\text{mol photons m}^{-2} \text{s}^{-1}$ . Differences in biomass composition and biosynthesis of metabolites  
650 impact the contribution of C, N, and S assimilation reactions (grey, blue, yellow, respectively).  
651 Respiration reactions are distributed across several different organelles including the plastid,  
652 peroxisome, and mitochondria (green, purple, red, respectively). Flux predictions with (a)  
653 baseline constraints on respiration, (b) photorespiration included, (c) photorespiration and  
654 energetic coupling included.

655

656 First, we noticed that photorespiration was not a part of the original pFBA prediction and  
657 that it could be an important sink for reductants in photosynthetic organisms. Photorespiratory  
658 flux, or the specificity of ribulose-1,5-bisphosphate carboxylase/oxygenase (RuBisCO) for  $\text{CO}_2$   
659 versus  $\text{O}_2$ , was calculated with the following expression [89]

$$\frac{v_c}{v_o} = \frac{V_c K_o}{V_o K_c} \cdot \frac{[\text{CO}_2]}{[\text{O}_2]}$$

660 where  $v_c$  is the carboxylase flux, and  $v_o$  is the oxygenase flux through RuBisCO,  $V_c K_o / V_o K_c$  is the  
661 specificity factor of RuBisCO for  $\text{CO}_2$  over  $\text{O}_2$ , and  $[\text{CO}_2]/[\text{O}_2]$  is the ratio of  $\text{CO}_2$  versus  $\text{O}_2$  in  
662 the pyrenoid. We used a specificity factor of 79, as determined for the related diatom *T.*  
663 *weissfloggii* [90] because of an assumed similarity in function based on the predicted peptide  
664 level similarities between the RuBisCO enzymes from the two diatoms (rbcS is 97% identical,  
665 rbcL is 98% identical). The concentration of  $\text{CO}_2$  in the pyrenoid, where most RuBisCO is  
666 located, is estimated at 100  $\mu\text{M}$  [91]. The concentration of  $\text{O}_2$  in the pyrenoid is unknown and is

667 difficult to measure [92]. We therefore used the ambient concentration of O<sub>2</sub> in seawater at  
668 equilibrium with the atmosphere (200 μM).

$$\frac{v_c}{v_o} = 79 \frac{\mu\text{mol CO}_2 \text{ min}^{-1}\text{mg}^{-1} \cdot \mu\text{M O}_2}{\mu\text{mol O}_2 \text{ min}^{-1}\text{mg}^{-1} \cdot \mu\text{M CO}_2} \cdot \frac{100 \mu\text{M CO}_2}{200 \mu\text{M O}_2}$$

669 Photorespiration was constrained with the following symbolic expression,

$$RUBISO\_h = 0.025 \cdot RUBISC\_h$$

670 where the oxygenase activity of RuBisCO is 2.5% the carboxylase activity. The addition of a  
671 photorespiratory constraint activates the oxygenase activity of RuBisCO as well as peroxisomal  
672 glycolate oxidase (Figure 3b). For a K<sub>m</sub> of 65 μM [90], pyrenoid CO<sub>2</sub> concentrations are likely  
673 higher than estimated because diatoms are not carbon-limited, and O<sub>2</sub> concentrations are thought  
674 to be lower (Young, pers. comm.) Thus, these simulations may overestimate the significance of  
675 photorespiration.

676 In diatoms, a major component of redox balance is the flow of reducing equivalents from  
677 the plastid to the mitochondria [9], based on the observation that flux of electrons through PSII  
678 depends on mitochondrial respiration. In a third experiment, we included energetic coupling  
679 between the plastid and the mitochondria by redirecting reductants generated by linear electron  
680 flow to NADH ubiquinone oxidoreductase with the following symbolic expression,

$$NADHOR\_m = 0.0015 \cdot PSI\_u$$

681 Little is known about the extent of energetic coupling in *T. pseudonana* and how it may change  
682 with acclimation to different light intensities, so the value of this constraint  
683 (NADHOR<sub>m</sub>/PSI<sub>u</sub>=0.0015) was chosen for exploratory purposes. Flow of reductants from the  
684 plastid activates the mitochondrial alternative oxidase reaction in *iTps1432* (Figure 3c). Larger  
685 values that increased the flux through alternative oxidase impacted the growth rate of *iTps1432*

686 because there was a trade-off with CEF which appears to be required for energy generation at  
687 these lower light levels.

688 The simulations under different light limiting conditions highlighted the interconnected  
689 pathways that diatoms rely on to balance reductant dissipation through biomass requirements and  
690 different respiratory pathways. These results raise the question of how the dissipation of  
691 reductants generated by photosynthesis occurs under nutrient-limitation conditions when  
692 biomass production cannot be used as an electron sink.

693

#### 694 **Effect of nitrogen starvation**

695 The previous simulations highlighted the importance of nitrate reduction as an electron  
696 sink under steady-state conditions. We next explored the impact of nitrogen limitation and  
697 starvation on reductant flow using dynamic Flux Balance Analysis (dFBA) to simulate growth in  
698 batch culture where cells are not in steady-state. Throughout the simulation, we tracked  
699 simulated nutrient and excreted metabolite concentrations in the media as well as molecular and  
700 elemental biomass composition. The simulations relied on experimental data [24,25] derived  
701 from *T. pseudonana* cells grown at  $85 \mu\text{mol photons m}^{-2} \text{s}^{-1}$  in a 12 : 12h light : dark cycle at  
702  $18^\circ\text{C}$  in f/2 media modified to initiate N-starvation. *T. pseudonana* acclimated to medium light  
703 levels ( $60 \mu\text{mol photons m}^{-2} \text{s}^{-1}$ ) is the closest condition examined in the previous simulation.  
704 Biomass composition and macro-nutrient concentrations were determined experimentally at 0, 1,  
705 3, 7, and 10 days after the start of the experiment. Measurements of biomass C, N, and P were  
706 made more frequently at 0, 1, 2, 3, 5, 7, and 10 days after the start of the experiment. Liefer, *et*  
707 *al.* [25] defined four different growth phases according to observed growth patterns: mid-  
708 exponential corresponded to N-replete steady-state growth (day 0); late exponential



709 corresponded to reduced growth after dilution to N-free media prior to stationary phase (day 1-  
710 3); early stationary corresponded to one day after cessation of cell division (day 7); and mid-  
711 stationary corresponded to five days after cessation of cell division (day 10).

712 In batch culture, biomass composition measurements are equal to the composition of cells  
713 from all previous time points plus newly synthesized biomass minus the re-mobilized biomass  
714 components. Biomass objective functions were computed for each time point by comparing the  
715 simulated biomass composition at the current time point to the experimentally measured biomass  
716 compositions at the different time points (target biomass composition) (Figure 4a). As nitrogen is  
717 depleted, *T. pseudonana* uses up protein and accumulates carbohydrates and lipids; there is also  
718 accumulation of DNA as cells stop actively dividing, a decrease in RNA and pigments per cell,  
719 and accumulation of residual P likely corresponding to polyphosphate storage ([24], Figure 4a).  
720 Experimental measurements and simulations of biomass composition produce C:N or N:P ratios  
721 that indicate cell composition was impacted by nitrogen starvation after 3 days in culture (Figure  
722 4b). After 10 days in culture, measurements of C:P decreased due to polyphosphate increasing as  
723 a cellular component in stationary phase. There is a similar change in C:P in the simulated  
724 *iTps1432* biomass composition (Figure 4b). Small differences between measurements and  
725 simulated elemental ratios could be attributed to both error in the bulk biomass composition data  
726 taken from the literature to supplement the experimental measurements (osmolytes, chitin,  
727 vitamins), errors in the assumed compositional data making up the larger components (molecular  
728 composition of RNA, protein, free amino acids, protein, carbohydrates, EPS, and lipids), or over-  
729 production and under-production of various components at different points in the simulation (S3  
730 Figure). Nevertheless, many measured biomass components were accurately simulated and the

731 predicted timing of nitrogen starvation was accurate, giving us confidence that our model reflects  
732 the principle effects of nitrogen limitation and starvation in batch culture.

733

734 **Figure 4** Target biomass composition and comparison between simulated and experimental  
735 biomass elemental ratios for the transition of *i*Tps1432 from exponential to stationary phase  
736 under nitrogen-limited conditions. (a) Biomass composition was measured 0, 1, 3, 7, and 10 days  
737 after transfer to fresh media with low nitrate and used to calculate the biomass objective function  
738 at each time point. (b) C:N, N:P, and C:P ratios were measured 0, 1, 2, 3, 5, 7, and 10 days after  
739 transfer and compared with simulated biomass elemental composition.

740

741 The added  $\text{NO}_3$  (and  $\text{NO}_2$ ) in the experimental media were depleted sometime between 1  
742 and 3 days after the initiation of the experiment; low levels of background  $\text{NH}_4$  in the media  
743 were depleted after 1 day. Simulated  $\text{NO}_3$  was completely depleted from the media shortly after  
744 1 day of growth whereas simulated  $\text{NH}_4$  was released into the media concurrent with the  $\text{NO}_3$   
745 depletion and was subsequently taken up and re-excreted into the media between the different  
746 target days. The simulated  $\text{PO}_4$  concentration in the media matched the observed gradual  
747 decrease over time (Figure 5a). The greatest discrepancy between the measured and simulated  
748 nutrients was for  $\text{Si}(\text{OH})_4$  concentrations. Experimental  $\text{Si}(\text{OH})_4$  concentrations were  
749 simultaneously drawn down with the  $\text{NO}_3$  during the first day and then plateaued at  $\sim 10 \mu\text{M}$ .  
750 The simulated drawdown of  $\text{Si}(\text{OH})_4$  instead plateaued at  $\sim 25 \mu\text{M}$  shortly after 1 day in culture.  
751 This difference likely reflects errors in the weight of the cell frustule used in the biomass  
752 objective function. This value was not experimentally measured and so the value used for the  
753 biomass objective functions was extrapolated from the difference between dry weight

754 measurements and the sum of other biomass components (S4 Data Set). Inaccurate simulation of  
755 silicate utilization will have little impact on the flow of reductants as the silicate condensation  
756 reaction to form the frustule is not a redox reaction. To simulate a diel pattern of biomass  
757 formation, we included over-production of chrysolaminarin and TAGs during the light period in  
758 the biomass objective functions and did not include production of TAGs, chrysolaminarin, and  
759 pigments in the dark period [61]. Biomass production was strongest during the light period and  
760 was typically followed by respiration of some biomass components in the dark to create a diel  
761 pattern of changing biomass concentration (Figure 5b).

762

763 **Figure 5** Comparison between simulated and experimental (solid, dashed lines) media nutrient  
764 concentration and biomass concentration for the transition of *i*Tps1432 from exponential to  
765 stationary phase under nitrogen-limited conditions. (a)  $\text{NO}_3$  (+  $\text{NO}_2$ ),  $\text{NH}_4$ ,  $\text{Si}(\text{OH})_4$ , and  $\text{PO}_4$   
766 were measured 0, 1, 3, 7, and 10 days after transfer to fresh media with low nitrate and compared  
767 to simulated media nutrient concentrations (b) Cell concentration ( $\text{cells mL}^{-1}$ ) was measured each  
768 day and converted to biomass concentration ( $\text{g L}^{-1}$ ) where measurements of cell dry weight were  
769 available and compared with the simulated biomass concentration. 12 : 12 h light : dark cycles  
770 are depicted with white and grey stripes.

771

772 The ability to accurately simulate uptake of nitrate and C:N under non-steady-state  
773 conditions motivated a more detailed examination of electron flow. Gross oxygen evolution from  
774 the PSII reaction was constrained based on the electron transfer rate and the number of PSII  
775 reaction centers per chlorophyll *a* measured on days 0, 1, 3, 7, and 10 of the experiment [24]. Per  
776 milligram of chlorophyll *a*, gross oxygen evolution decreased slightly on the first day and

777 remained steady until the seventh day, with a sharp increase on the tenth day of the experiment  
778 (Figure 6a). There is good agreement between gross oxygen production measured at  $85 \mu\text{mol}$   
779  $\text{photons m}^{-2} \text{s}^{-1}$  for cells acclimated to medium light intensity grown in chemostats [23] to the  
780 PSII flux calculated with data from FRRf for cells in mid-exponential phase (Figure 6a). On a  
781 gram dry weight basis, there is an initial increase in PSII flux followed by a gradual decline over  
782 the course of the experiment as a result of declining chlorophyll *a* concentrations relative to total  
783 biomass. PSII flux is only slightly higher on the tenth day of the experiment on a gram dry  
784 weight basis (Figure 6a). The simulation includes diel fluctuations in chrysolaminarin and TAG  
785 production which create regular fluctuations in the ratio of O:C of new biomass (Figure 6b). The  
786 elemental formula of newly produced biomass was used to calculate a range of possible  
787 photosynthetic quotients (PQ: the proportion of oxygen evolved to inorganic carbon assimilated  
788 in the light) given growth on nitrate or ammonia (Figure 6c). The combination of constraints on  
789 the PSII, oxygen exchange, and inorganic carbon assimilation reactions limit respiration during  
790 the light period, while respiration is left unconstrained in the dark period. In general, total  
791 respiratory flux increases with increased flux through PSII, although there is some influence by  
792 the photosynthetic quotient (Figure 6c, 6d). Diel changes in respiration are controlled by diel  
793 patterns in biomass formation in which the rates of chrysolaminarin and TAG production vary  
794 throughout the light period. During the light period plastid terminal oxidase and the Mehler  
795 reaction are the primary respiratory fluxes. During the dark period, respiration switches to  
796 peroxisomal glycolate oxidase and cytochrome *c* oxidase as organic matter is respired for energy  
797 (Figure 6d).  
798

799 **Figure 6** Simulated respiratory flux predictions (in  $\text{mmol O}_2 \text{ gDW}^{-1} \text{ h}^{-1}$ ) and the constraints  
800 affecting respiration for the transition of *i*Tps1432 from exponential to stationary phase under  
801 nitrogen-limited conditions. (a) Flux through the PSII reaction is driven by photon absorption  
802 and is constrained by measurements taken 0, 1, 3, 7, and 10 days after transfer to fresh media  
803 with low nitrate (green,  $\text{mmol O}_2 \text{ mg chl } a^{-1} \text{ h}^{-1}$ , [24], S3 Data Set). The 95% confidence  
804 intervals were converted from  $\text{mmol O}_2 \text{ mg chl } a^{-1} \text{ h}^{-1}$  to  $\text{mmol O}_2 \text{ gDW}^{-1} \text{ h}^{-1}$  using simulated mg  
805 chl *a* / gDW and set as lower and upper bounds of the reaction. Steady-state N-replete  $\pm$  95%  
806 confidence interval (black) measurement of net oxygen production [23] was plotted at the 0 h  
807 time point. Simulation results are plotted here for each 3 h increment in  $\text{mmol O}_2 \text{ gDW}^{-1} \text{ h}^{-1}$   
808 (black). (b) Plot of simulated new biomass O : C molar ratio during the light (black) and dark  
809 (grey) period. (c) The photosynthetic quotient was calculated from the simulated new biomass  
810 elemental composition during the light period (black) and also contributes to the respiratory flux  
811 results. Oxygen and inorganic carbon assimilation were left unconstrained during the dark period  
812 (grey). (d) Respiratory flux predictions and contribution of different respiration reactions  
813 (plastid: green, mitochondria: red, peroxisome: purple). 12 : 12 h light : dark cycles are depicted  
814 with white and grey stripes.

815

816 The photosynthetic quotient is the proportion of oxygen evolved to inorganic carbon  
817 assimilated in the light and its calculation assumes that all assimilated  $\text{CO}_2$  is used to generate  
818 biomass. However, diatoms are known to excrete dissolved organic carbon during  
819 photosynthesis. For this reason, we explored a range of different PQ constraints (95% PQ –  
820 105% PQ) to see how this assumption impacts metabolite secretion (Figure 7). Metabolite  
821 excretion can occur if the by-product of a reaction cannot be assimilated by the organism; for

822 example, cyanide is a by-product of cyanocobalamin utilization. Occasionally cyanide is used by  
823 3-mercaptopyruvate sulfurtransferase in the de-sulfuration of 3-mercaptopyruvate, resulting in  
824 the excretion of thiocyanate. Cyanocobalamin is a form of vitamin B<sub>12</sub> frequently used in culture  
825 media, but is not widely available in the environment. Polyphosphate is also a by-product in  
826 vitamin B<sub>12</sub> metabolism and folate biosynthesis; excess is excreted and then re-assimilated at  
827 later time points as the preferred source of phosphorus (Diaz2019). In this simulation,  
828 metabolites are excreted predominantly as a result of biomass re-mobilization or to balance  
829 redox.

830

831 **Figure 7** Simulated metabolite excretion by *i*Tps1432 during the transition from exponential to  
832 stationary phase under nitrogen-limited conditions across a range of possible photosynthetic  
833 quotient constraints. Note that y-axes are scaled to each metabolite and metabolites are listed in  
834 order of highest to lowest maximum concentration. Metabolites composed of organic carbon are  
835 labeled red, organic nitrogen are blue, organic sulfur are yellow, and inorganic are black.

836

837 Formate and DMSP production were most strongly impacted by changes in the PQ.  
838 DMSP production increases with the photosynthetic quotient (or when respiration is low).  
839 Conversely, formate production is highest when respiration is high (Figure 7). Similarly, more  
840 ethanol is excreted when the PQ is higher and more urea is excreted when the PQ is lower than  
841 predicted by biomass composition, and then both are re-assimilated at night. Other metabolites,  
842 proline, leucine, formamide, xanthine, and urate, appear to be by-products of re-mobilizing  
843 certain biomass components (protein, free amino acids, RNA) to achieve the targeted objective.

844 Some metabolites including L-aspartate, acetate, glycolate, glycine, L-glutamate, and L-  
845 threonine appear to be more sporadically excreted and re-assimilated.

846 We evaluated reactions involved in N and S metabolism in simulations where DMSP is  
847 excreted and found increased sulfate assimilation after the onset of NO<sub>3</sub> depletion (Figure 8).  
848 NO<sub>3</sub> reductase uses 1 NADH to produce NO<sub>2</sub> in the cytosol, NO<sub>2</sub> reductase is localized in the  
849 plastid and uses 3 NADPH to produce NH<sub>4</sub>, and the GS-GOGAT cycle assimilates NH<sub>4</sub> while  
850 utilizing ATP and 2 reduced ferredoxin when localized in the plastid. After NO<sub>3</sub> is depleted,  
851 ammonia assimilation continues sporadically throughout the time course as a side-effect of the  
852 ammonia excreted due to the re-mobilization of different pools of organic nitrogen during  
853 biomass composition changes. SO<sub>4</sub> can be assimilated in the plastid by a plastid-localized  
854 ATP:sulfate adenylyltransferase that produces adenylyl sulfate (APS). APS reduction to SO<sub>3</sub>  
855 consumes a reduced thioredoxin, SO<sub>3</sub> reductase is plastid localized and consumes 6 reduced  
856 ferredoxin to produce H<sub>2</sub>S. SO<sub>4</sub> reduction to sulfide becomes more prevalent immediately after  
857 NO<sub>3</sub> is depleted and results in DMSP excretion (Figures 7, 8). 2-aminoacrylate sulfotransferase  
858 also contributes to redox balance by consuming 1 NADPH in the production of L-cysteate which  
859 is thought to be an intermediate in DHPS production (Durham2019), a component of diatom  
860 biomass in *iTps1432*.

861

862 **Figure 8** Simulated N & S (blue, yellow) metabolic flux predictions (in mmol e<sup>-</sup> gDW<sup>-1</sup> h<sup>-1</sup>,  
863 bottom panel) during the transition of *iTps1432* from exponential to stationary phase under  
864 nitrogen-limited conditions with a 102% photosynthetic quotient constraint.

865

866 **Discussion**

867           The interdependence between biomass composition, photon absorption, nutrient  
868 utilization, and photosynthetic constraints is a distinguishing feature of *i*Tps1432, and a critical  
869 component of photosynthetic modeling given the dynamic nature of biomass composition and its  
870 role in photosynthesis. These interconnections allowed us to model the different ways that  
871 diatoms may maintain redox balance. A critical first step was development of biomass objective  
872 functions for three different light levels (5, 60, 200  $\mu\text{mol photons m}^{-2} \text{ s}^{-1}$ ) and use of chemostat  
873 production measurements to constrain flux for different light intensities (Figure 2). Given an  
874 elemental formula for biomass composition, the degree of reduction can be calculated as the  
875 number of electron equivalents per gram atom C [93]. The inverse relationship between protein  
876 content of cells and light meant that the degree of reduction was also inversely related to light  
877 (5.66, low light; 5.47, medium light; 4.97, high light). More highly reduced biomass composition  
878 as result of increased nitrate assimilation, in addition to increased light-dependent respiration at  
879 low light could be part of a previously proposed strategy that *T. pseudonana* limits respiration of  
880 organic carbon by using alternative redox balance strategies in order to improve the efficiency of  
881 biomass production [23].

882           Photosynthetic organisms have evolved a variety of mechanisms to deal with the primary  
883 challenge of photosynthesis: how to capture light energy while evading potential damage. Over  
884 longer time periods, diatoms adjust their pigment composition to deal with incoming light  
885 energy, but short-term fluctuations in light intensity with inadequate sinks for electrons could  
886 theoretically cause a plastid to become over-reduced and damaged. Energy dissipation as heat or  
887 fluorescence (non-photochemical quenching) is one potential mechanism, summarized in  
888 *i*Tps1432 as a photon loss reaction. The metabolic challenge of photochemical quenching is  
889 managing the mis-match between reduced ferredoxin produced by linear electron flow and the



890 actual metabolic requirements for NADPH. Light-dependent respiration reactions in the plastid  
891 are one of the primary sinks for reductants. Alternatively, reduced metabolites can be exported  
892 from the plastid and oxidized by mitochondrial respiration. Finally, cyclic electron flow is  
893 another potential sink for reductants, as well as a non-reducing source of energy since the  
894 reaction drives proton pumping by cytochrome *b<sub>6</sub>/f*. Halsey & Fisher postulated that CEF could  
895 be more important at lower light levels, but did not measure it in their experiment [23]. Our FBA  
896 predicted that CEF is a major component of alternative electron flow, particularly at lower light  
897 levels (Figure 3a). This finding was unexpected as it has been shown that CEF is less than 5% of  
898 maximal electron flow and the transfer of reductants from the plastid to the mitochondria is more  
899 prevalent in diatoms when compared to plants [9]. The absolute flux of CEF remains relatively  
900 constant across all light levels and in multiple diatom species [9]. We used FBA to calculate an  
901 upper bound for CEF at saturating light levels (maximal electron flow). At low light levels, this  
902 flux value is relatively important given the decrease in total electron flow as light intensity goes  
903 down. In the data given by Bailleul *et al.* [9], CEF makes up about half of TEF at the lowest light  
904 level measured ( $\sim 100 \mu\text{mol photon m}^{-2} \text{ s}^{-1}$ ); so we may be underestimating its importance at  
905 these light levels due to the poorly constrained values of growth-associated ATP maintenance,  
906 and given the contribution of CEF to energy generation.

907       Respiration via cytochrome *c* oxidase is activated by the respiration of transient organic  
908 carbon pools by the mitochondrial TCA cycle. Some of the transient organic carbon that was  
909 calculated to be available (as the difference between gross and net carbon production  
910 measurements) is directly utilized, as evidenced by the decreased use of the Calvin cycle at 200  
911  $\mu\text{mol photon m}^{-2} \text{ s}^{-1}$  (Figure 3a). Remaining respiratory flux was routed through the Mehler  
912 reaction or plastid terminal oxidase. In the Mehler reaction, oxygen reacts with reduced

913 ferredoxin emerging from photosystem I and forms a superoxide anion. Superoxide dismutase  
914 neutralized two reactive anions into oxygen and hydrogen peroxide, and ascorbate peroxidase  
915 converts hydrogen peroxide into water. NAD(P)H is consumed through the glutathione-ascorbate  
916 cycle (Figure 1). Chlororespiration results from the oxidation of the plastoquinone pool by  
917 plastid terminal oxidase (Figure 1) and was historically defined as an electron transport chain in  
918 the thylakoid membrane involving a proton-translocating NADH:plastoquinone reductase  
919 complex (NDH1) and a plastid terminal oxidase (PTOX) [94]. *T. pseudonana* and other  
920 unicellular algae lack an NDH complex [95], and likely rely on a non-electrogenic NDH2 or  
921 ferredoxin:plastoquinone reductase (CEF) to fuel the terminal oxidase [94,96]. Chlororespiration  
922 is thought to be only active in low light conditions or darkness [96,97]. Here FBA predicts that  
923 PTOX is active at the medium light levels, and the Mehler reaction is active at low and high  
924 light. Parsimonious FBA minimizes the absolute sum of fluxes, and therefore returns a single  
925 solution with the lowest possible number of active fluxes. As a result, only one light-dependent  
926 respiration reaction is active and this may not be realistic. We experimented with different  
927 constraints on respiration using the available information in the literature (Figure 1).

928         Photorespiration occurs whenever there is oxygen in the pyrenoid because the enzyme  
929 RuBisCO cannot always distinguish between O<sub>2</sub> and CO<sub>2</sub>. We activated photorespiratory flux by  
930 assuming a high concentration of O<sub>2</sub> relative to CO<sub>2</sub> in the pyrenoid. This constraint activated the  
931 oxygenase activity of RuBisCO as well as peroxisomal glycolate oxidase (Figure 3b). In  
932 diatoms, photorespiration is truncated and 2-phosphoglycolate is not recycled back to ribulose-  
933 1,5-bisphosphate [98]. Glycolate can be oxidized to glyoxylate and then converted to either  
934 malate or transaminated to glycine or is excreted under certain conditions [99,100]. Alternative  
935 oxidase was activated by imposing an energetic coupling constraint on PSI and NADH

936 ubiquinone oxidoreductase to simulate energetic coupling [26] (Figure 3c). However, only a low  
937 level of energetic coupling ( $\text{NADHOR/PSI} = 0.15\%$ ) could be introduced before the constraint  
938 impacted biomass production. This observation supports the idea that CEF is more important at  
939 low light levels, and can be inhibited if reductants are diverted to the mitochondria. CEF helps  
940 generate a proton gradient in order to fuel ATP production; this could be an important reaction  
941 when light levels are low and cells are more energy starved, which is why our predictions are  
942 dependent on the GAM.

943         In addition to respiration, nitrate and sulfate assimilation also contribute to balancing  
944 redox reactions in the plastid, the relative impact of which depends on how cells adjust  
945 respiration rates in response to changing redox pressures [101]. We simulated the progression of  
946 a batch culture from nitrate limitation to N-starvation using dynamic FBA (Figure 5). When  
947 nitrate is depleted, diatoms continue to produce biomass by re-mobilizing internal sources of  
948 nitrogen and producing more of the carbohydrates [25]: chrysolaminarin and EPS (Figure 4a).  
949 Diatoms also experience decreased flux through PSII caused by pigment degradation [24], which  
950 decreases light absorption. Data on net oxygen evolution as nitrogen is depleted in batch culture  
951 was not available; we calculated a range of possible photosynthetic quotients from the new  
952 biomass equation at each time point based on biomass production from nitrate versus ammonia.  
953 This strategy only accounts for metabolites that are part of the objective function and doesn't  
954 account for the possibility of excreted metabolites or the re-mobilization of biomass components.  
955 We tested a range of different PQ constraints (95% - 105% the original PQ value) and found a  
956 potential role for sulfate assimilation after nitrate is depleted (Figure 8). Secretion of the organic  
957 sulfur compound DMSP as a result of increased sulfate assimilation is in line with previous  
958 experimental work indicating that nitrate limitation causes the greatest increase in intracellular

959 DMSP production [102] (Figure 7). DMSP is hypothesized to act as an osmolyte replacing stores  
960 of proline, under nitrate limitation [102]. Many of the compounds produced and excreted by  
961 *iTps1432* are compatible solutes, a class of compounds known to be transported in and out of  
962 cells in response to changes in osmotic pressure. We did not account for the possibility of  
963 changing osmolyte composition as part of the biomass objective function as the only  
964 measurement of osmolytes are from N-replete conditions [21].

965 Experimental support for a role for nitrate uptake in response to fluctuating redox  
966 pressures comes from the observation that nitrogen-replete diatoms secrete ammonium during  
967 rapid increases in irradiance [103]. Additionally, enzymes within nitrogen and sulfur assimilation  
968 pathways in diatoms, are redox-sensitive [104]. Nitrate assimilation is likely to be more effective  
969 at dissipating reductants than sulfate assimilation because of low consumption of ATP relative to  
970 NADPH equivalents. However, sulfate is consistently available at high concentrations (28 mM,  
971 [105]) throughout the ocean whereas nitrate is typically limiting in both coastal regions [106] and  
972 in the subtropical gyres [107]. Although our focus was on growth limitation by nitrate, other  
973 types of nutrient-limitation (such as silicon, iron, zinc, or vitamin B<sub>12</sub> [108]) may impact redox  
974 balance by limiting biomass formation.

975 In our simulations, *iTps1432* reduces ATP demand by limiting flux through the TCA  
976 cycle and instead secretes ethanol and formate (Figure 7), both of which are suggestive of some  
977 level of fermentation. Anaerobic bacterial cultures are known to accumulate fermentation  
978 products, and metabolic models of *E. coli* quantitatively predict their secretion [11]. Formate is a  
979 by-product of the methionine salvage pathway or DMSP biosynthesis, and is produced via  
980 pyruvate formate lyase, an alternative reaction to pyruvate dehydrogenase. In *E. coli*, ethanol is  
981 typically produced via alcohol dehydrogenase that detoxifies acetaldehyde generated by pyruvate

982 decarboxylase during fermentation. *T. pseudonana* lacks the gene for pyruvate decarboxylase,  
983 and instead produced acetaldehyde as a by-product of threonine aldolase. In *iTps1432*,  
984 acetaldehyde is either converted into ethanol and excreted or into acetate which may rejoin the  
985 TCA cycle as acetyl-CoA. Both cyanobacteria and the green alga *Chlamydomonas* accumulate  
986 fermentation products under dark anaerobic conditions [109,110], likely due to inhibition of  
987 mitochondrial respiration [111]. The diatom *P. tricornutum* appears to increase rates of  
988 mitochondrial respiration under stressful conditions (high light intensity, iron or nitrate  
989 limitation, or supraoptimal temperatures) as suggested by upregulation of alternative oxidase  
990 expression [112]. While *T. pseudonana* displays here the potential to secrete fermentation  
991 products, fermentation is likely minimal during normal culture conditions. We hypothesize that  
992 fermentation may instead occur in nature when respiration rates do not increase rapidly enough  
993 to match increased redox pressure such as may occur under fluctuating light conditions or in  
994 organisms with very rapid growth rates [113].

995       Amino acids are commonly secreted by a variety of diatoms [20,114]. We were surprised  
996 to predict the secretion of amino acids by *iTps1432* under nitrate starvation conditions (Figure  
997 7). Secretion of these amino acids occurs mostly during shifts to new biomass targets where  
998 protein re-mobilization is possible and are not impacted by changes in respiration. We did not  
999 include transport reactions for small peptides although these compounds are an important  
1000 component of secreted metabolites in *T. pseudonana*, possibly as a by-product of protein  
1001 turnover [115]. During N-starvation we would expect protein re-mobilization to contribute to  
1002 biomass formation for other metabolites requiring nitrogen rather than result in excretion of  
1003 amino acids. This observation is similar to the degradation of RNA nucleotides into urate and  
1004 xanthine and the excretion of formamide (Figure 7). Perhaps these nitrogenous compounds are

1005 too highly reduced to be useful during nitrate starvation and are therefore released into the  
1006 environment.

1007 Most of the metabolites secreted by *i*Tps1432 can be consumed by marine bacteria. For  
1008 example, a subset of marine bacteria can utilize glycolate as a sole carbon source [116], and  
1009 bacterial transcripts for glycolate oxidase were found to vary on a diel cycle during a  
1010 phytoplankton bloom [117]. Many bacteria from the Roseobacter clade rely on organic nitrogen  
1011 and sulfur compounds produced by phytoplankton or other bacteria as they are unable to reduce  
1012 nitrate or nitrite and some cannot reduce sulfate [118]. Alphaproteobacteria and  
1013 Gammaproteobacteria are known to degrade DMSP into methanethiol (CH<sub>4</sub>S) or dimethyl  
1014 sulfide (DMS) [119]. Differences in the metabolic networks of phytoplankton as well as  
1015 differences in respiration, and how different species react to fluctuations in environmental  
1016 conditions and redox imbalances will impact the character and quantity of metabolites secreted.  
1017 These are likely major factors that structure the bacterial community associated with  
1018 phytoplankton and control bacterial succession over the course of a bloom [120].

1019

## 1020 **Conclusion**

1021 *Thalassiosira pseudonana* CCMP 1335 was isolated from Moriches Bay, New York, in  
1022 1958, and the whole genome was sequenced in 2004 [121]. With availability of the genome, *T.*  
1023 *pseudonana* has been studied from a systems-wide perspective using transcriptomics,  
1024 proteomics, and metabolomics (eg. [115,122–125]). The genome-scale metabolic model of *T.*  
1025 *pseudonana* created here builds on previous modeling work [26], incorporates currently available  
1026 physiological and genomic data, and will serve as a powerful tool to generate hypotheses about  
1027 diatom metabolism and to interpret future experiments.

1028 *i*Tps1432 could be extended in a variety of directions in the future. Reactions describing  
1029 complex formation for metal- and cofactor-requiring proteins could be added to the model to  
1030 better describe vitamin and trace metal utilization, as trace metal limitation is an important  
1031 nutrient condition in the ocean [108] and vitamins play an import role in interactions with  
1032 bacteria [126,127]. Additionally, an effort to better characterize transporters would significantly  
1033 improve prediction of metabolite secretion and mechanisms of energetic coupling between the  
1034 plastid and the mitochondria. The development of representative marine metabolic models, such  
1035 as *i*Tps1432, could allow us to integrate molecular data with models of ocean biogeochemistry in  
1036 the future.

1037

### 1038 **Acknowledgements**

1039 Thanks to H.V.'s committee members, Elhanan Borenstein, Jody Deming, and Anitra Ingalls, for  
1040 their insight and advice. Thanks to Kimberly Halsey & Justin Liefer for providing and discussing  
1041 data from their publications. This work was supported by Gordon and Betty Moore Foundation  
1042 grant GBMF3776 awarded to E. Virginia Armbrust. This document has been approved for  
1043 release: LLNL-JRNL-815904.

1044

### 1045 **References**

- 1046 1. Falkowski PG. The Evolution of Modern Eukaryotic Phytoplankton. *Science* (80- ).  
1047 2004;305: 354–360. doi:10.1126/science.1095964
- 1048 2. Sims PA, Mann DG, Medlin LK. Evolution of the diatoms: insights from fossil, biological  
1049 and molecular data. *Phycologia*. 2006;45: 361–402. doi:10.2216/05-22.1
- 1050 3. Allen JF. Photosynthesis of ATP—Electrons, Proton Pumps, Rotors, and Poise. *Cell*.

- 1051 2002;110: 273–276. doi:10.1016/S0092-8674(02)00870-X
- 1052 4. Kramer DM, Evans JR. The Importance of Energy Balance in Improving Photosynthetic  
1053 Productivity. *Plant Physiol.* 2011;155: 70–78. doi:10.1104/pp.110.166652
- 1054 5. Kyle DJ, Ohad I, Arntzen CJ. Membrane protein damage and repair: Selective loss of a  
1055 quinoneprotein function in chloroplast membranes. *Botany.* 1984;81: 4070–4074.  
1056 doi:10.1073/pnas.81.13.4070
- 1057 6. Asada K. The water–water cycle as alternative photon and electron sinks. Osmond CB,  
1058 Foyer CH, Bock G, editors. *Philos Trans R Soc London Ser B Biol Sci.* 2000;355: 1419–  
1059 1431. doi:10.1098/rstb.2000.0703
- 1060 7. Munekage Y, Hashimoto M, Miyake C, Tomizawa K-I, Endo T, Tasaka M, et al. Cyclic  
1061 electron flow around photosystem I is essential for photosynthesis. *Nature.* 2004;429:  
1062 579–582. doi:10.1038/nature02598
- 1063 8. Allen J. Oxygen reduction and optimum production of ATP in photosynthesis. *Nature.*  
1064 1975;256: 599–600. doi:10.1038/256599a0
- 1065 9. Bailleul B, Berne N, Murik O, Petroustos D, Prihoda J, Tanaka A, et al. Energetic  
1066 coupling between plastids and mitochondria drives CO<sub>2</sub> assimilation in diatoms. *Nature.*  
1067 2015;524: 366–369. doi:10.1038/nature14599
- 1068 10. Dyhrman ST, Benitez-Nelson CR, Orchard ED, Haley ST, Pellechia PJ. A microbial  
1069 source of phosphonates in oligotrophic marine systems. *Nat Geosci.* 2009;2: 696–699.  
1070 doi:10.1038/ngeo639
- 1071 11. Varma A, Palsson BO. Stoichiometric flux balance models quantitatively predict growth  
1072 and metabolic by-product secretion in wild-type *Escherichia coli* W3110. *Appl Environ*  
1073 *Microbiol.* 1994;60: 3724–3731. doi:10.1128/AEM.60.10.3724-3731.1994



- 1074 12. Klausmeier CA, Litchman E, Levin SA. Phytoplankton growth and stoichiometry under  
1075 multiple nutrient limitation. *Limnol Oceanogr.* 2004;49: 1463–1470.  
1076 doi:10.4319/lo.2004.49.4\_part\_2.1463
- 1077 13. Price NM. The elemental stoichiometry and composition of an iron-limited diatom.  
1078 *Limnol Oceanogr.* 2005;50: 1159–1171. doi:10.4319/lo.2005.50.4.1159
- 1079 14. Verschoor A, Van Dijk M, Huisman J, Van Donk E. Elevated CO<sub>2</sub> concentrations affect  
1080 the elemental stoichiometry and species composition of an experimental phytoplankton  
1081 community. *Freshw Biol.* 2013;58: 597–611. doi:10.1111/j.1365-2427.2012.02833.x
- 1082 15. Finkel Z V., Quigg A, Raven JA, Reinfelder JR, Schofield OE, Falkowski PG. Irradiance  
1083 and the elemental stoichiometry of marine phytoplankton. *Limnol Oceanogr.* 2006;51:  
1084 2690–2701. doi:10.4319/lo.2006.51.6.2690
- 1085 16. Danger M, Oumarou C, Benest D, Lacroix G. Bacteria can control stoichiometry and  
1086 nutrient limitation of phytoplankton. *Funct Ecol.* 2007;21: 202–210. doi:10.1111/j.1365-  
1087 2435.2006.01222.x
- 1088 17. Zlotnik I, Dubinsky Z. The effect of light and temperature on DOC excretion by  
1089 phytoplankton. *Limnol Oceanogr.* 1989;34: 831–839. doi:10.4319/lo.1989.34.5.0831
- 1090 18. Lomas MW, Glibert PM. Temperature regulation of nitrate uptake: A novel hypothesis  
1091 about nitrate uptake and reduction in cool-water diatoms. *Limnol Oceanogr.* 1999;44:  
1092 556–572. doi:10.4319/lo.1999.44.3.0556
- 1093 19. Mykkestad SM. Release of extracellular products by phytoplankton with special emphasis  
1094 on polysaccharides. *Sci Total Environ.* 1995;165: 155–164. doi:10.1016/0048-  
1095 9697(95)04549-G
- 1096 20. Granum E, Kirkvold S, Mykkestad S. Cellular and extracellular production of

- 1097 carbohydrates and amino acids by the marine diatom *Skeletonema costatum*: diel  
1098 variations and effects of N depletion. *Mar Ecol Prog Ser.* 2002;242: 83–94.  
1099 doi:10.3354/meps242083
- 1100 21. Durham BP, Boysen AK, Carlson LT, Groussman RD, Heal KR, Cain KR, et al.  
1101 Sulfonate-based networks between eukaryotic phytoplankton and heterotrophic bacteria in  
1102 the surface ocean. *Nat Microbiol.* 2019;4: 1706–1715. doi:10.1038/s41564-019-0507-5
- 1103 22. Orth JD, Thiele I, Palsson BØ. What is flux balance analysis? *Nat Biotechnol.* 2010;28:  
1104 245–248. doi:10.1038/nbt.1614
- 1105 23. Fisher NL, Halsey KH. Mechanisms that increase the growth efficiency of diatoms in low  
1106 light. *Photosynth Res.* 2016;129: 183–197. doi:10.1007/s11120-016-0282-6
- 1107 24. Liefer JD, Garg A, Campbell DA, Irwin AJ, Finkel Z V. Nitrogen starvation induces  
1108 distinct photosynthetic responses and recovery dynamics in diatoms and prasinophytes.  
1109 Ianora A, editor. *PLoS One.* 2018;13: e0195705. doi:10.1371/journal.pone.0195705
- 1110 25. Liefer JD, Garg A, Fyfe MH, Irwin AJ, Benner I, Brown CM, et al. The Macromolecular  
1111 Basis of Phytoplankton C:N:P Under Nitrogen Starvation. *Front Microbiol.* 2019;10: 1–  
1112 16. doi:10.3389/fmicb.2019.00763
- 1113 26. Levering J, Broddrick J, Dupont CL, Peers G, Beeri K, Mayers J, et al. Genome-Scale  
1114 Model Reveals Metabolic Basis of Biomass Partitioning in a Model Diatom. Ianora A,  
1115 editor. *PLoS One.* 2016;11: e0155038. doi:10.1371/journal.pone.0155038
- 1116 27. Gruber A, Rocap G, Kroth PG, Armbrust EV, Mock T. Plastid proteome prediction for  
1117 diatoms and other algae with secondary plastids of the red lineage. *Plant J.* 2015;81: 519–  
1118 528. doi:10.1111/tpj.12734
- 1119 28. Caspi R, Altman T, Billington R, Dreher K, Foerster H, Fulcher CA, et al. The MetaCyc

- 1120 database of metabolic pathways and enzymes and the BioCyc collection of  
1121 Pathway/Genome Databases. *Nucleic Acids Res.* 2014;42: D459–D471.  
1122 doi:10.1093/nar/gkt1103
- 1123 29. Parker K. Metabolic Network Construction Based on the Genome of the Marine Diatom  
1124 *Thalassiosira Pseudonana* and the Analysis of Genome-wide Transcriptome Data to  
1125 Investigate Triacylglyceride Accumulation. San Jose State University. 2013.
- 1126 30. Li L. OrthoMCL: Identification of Ortholog Groups for Eukaryotic Genomes. *Genome*  
1127 *Res.* 2003;13: 2178–2189. doi:10.1101/gr.1224503
- 1128 31. King ZA, Lu J, Dräger A, Miller P, Federowicz S, Lerman JA, et al. BiGG Models: A  
1129 platform for integrating, standardizing and sharing genome-scale models. *Nucleic Acids*  
1130 *Res.* 2016;44: D515–D522. doi:10.1093/nar/gkv1049
- 1131 32. Thiele I, Palsson BØ. A protocol for generating a high-quality genome-scale metabolic  
1132 reconstruction. *Nat Protoc.* 2010;5: 93–121. doi:10.1038/nprot.2009.203
- 1133 33. Jones P, Binns D, Chang H-Y, Fraser M, Li W, McAnulla C, et al. InterProScan 5:  
1134 genome-scale protein function classification. *Bioinformatics.* 2014;30: 1236–1240.  
1135 doi:10.1093/bioinformatics/btu031
- 1136 34. Kanehisa M, Furumichi M, Tanabe M, Sato Y, Morishima K. KEGG: new perspectives on  
1137 genomes, pathways, diseases and drugs. *Nucleic Acids Res.* 2017;45: D353–D361.  
1138 doi:10.1093/nar/gkw1092
- 1139 35. Elbourne LDH, Tetu SG, Hassan KA, Paulsen IT. TransportDB 2.0: a database for  
1140 exploring membrane transporters in sequenced genomes from all domains of life. *Nucleic*  
1141 *Acids Res.* 2017;45: D320–D324. doi:10.1093/nar/gkw1068
- 1142 36. Ebrahim A, Lerman JA, Palsson BO, Hyduke DR. COBRApy: COntstraints-Based

- 1143 Reconstruction and Analysis for Python. *BMC Syst Biol.* 2013;7: 74. doi:10.1186/1752-  
1144 0509-7-74
- 1145 37. Fritzemeier CJ, Hartleb D, Szappanos B, Papp B, Lercher MJ. Erroneous energy-  
1146 generating cycles in published genome scale metabolic networks: Identification and  
1147 removal. Maranas CD, editor. *PLOS Comput Biol.* 2017;13: e1005494.  
1148 doi:10.1371/journal.pcbi.1005494
- 1149 38. Hartleb D, Jarre F, Lercher MJ. Improved Metabolic Models for *E. coli* and *Mycoplasma*  
1150 genitalium from GlobalFit, an Algorithm That Simultaneously Matches Growth and Non-  
1151 Growth Data Sets. Patil KR, editor. *PLOS Comput Biol.* 2016;12: e1005036.  
1152 doi:10.1371/journal.pcbi.1005036
- 1153 39. Broddrick JT, Du N, Smith SR, Tsuji Y, Jallet D, Ware MA, et al. Cross-compartment  
1154 metabolic coupling enables flexible photoprotective mechanisms in the diatom  
1155 *Phaeodactylum tricornutum*. *New Phytol.* 2019;222: 1364–1379. doi:10.1111/nph.15685
- 1156 40. Emanuelsson O, Brunak S, von Heijne G, Nielsen H. Locating proteins in the cell using  
1157 TargetP, SignalP and related tools. *Nat Protoc.* 2007;2: 953–971.  
1158 doi:10.1038/nprot.2007.131
- 1159 41. Petersen TN, Brunak S, von Heijne G, Nielsen H. SignalP 4.0: discriminating signal  
1160 peptides from transmembrane regions. *Nat Methods.* 2011;8: 785–786.  
1161 doi:10.1038/nmeth.1701
- 1162 42. Gschloessl B, Guermeur Y, Cock JM. HECTAR: A method to predict subcellular  
1163 targeting in heterokonts. *BMC Bioinformatics.* 2008;9: 393. doi:10.1186/1471-2105-9-  
1164 393
- 1165 43. Claros MG, Vincens P. Computational Method to Predict Mitochondrially Imported

- 1166 Proteins and their Targeting Sequences. *Eur J Biochem.* 1996;241: 779–786.  
1167 doi:10.1111/j.1432-1033.1996.00779.x
- 1168 44. Cokol M, Nair R, Rost B. Finding nuclear localization signals. *EMBO Rep.* 2000;1: 411–  
1169 415. doi:10.1093/embo-reports/kvd092
- 1170 45. Gattiker A, Gasteiger E, Bairoch A. ScanProsite: a reference implementation of a  
1171 PROSITE scanning tool. *Appl Bioinformatics.* 2002;1: 107–8. doi:10.1007/978-1-59745-  
1172 398-1\_25
- 1173 46. Gonzalez NH, Felsner G, Schramm FD, Klingl A, Maier U-G, Bolte K. A single  
1174 peroxisomal targeting signal mediates matrix protein import in diatoms. Waller RF, editor.  
1175 *PLoS One.* 2011;6: e25316. doi:10.1371/journal.pone.0025316
- 1176 47. Kroth PG, Chiovitti A, Gruber A, Martin-Jezequel V, Mock T, Parker MS, et al. A model  
1177 for carbohydrate metabolism in the diatom *Phaeodactylum tricornutum* deduced from  
1178 comparative whole genome analysis. Kroymann J, editor. *PLoS One.* 2008;3: e1426.  
1179 doi:10.1371/journal.pone.0001426
- 1180 48. Broddrick JT, Rubin BE, Welkie DG, Du N, Mih N, Diamond S, et al. Unique attributes  
1181 of cyanobacterial metabolism revealed by improved genome-scale metabolic modeling  
1182 and essential gene analysis. *Proc Natl Acad Sci.* 2016;113: E8344–E8353.  
1183 doi:10.1073/pnas.1613446113
- 1184 49. McCarthy A, Rogers SP, Duffy SJ, Campbell DA. Elevated carbon dioxide differentially  
1185 alters the photophysiology of *Thalassiosira pseudonana* (Bacillariophyceae) and *Emiliana*  
1186 *huxleyi* (Haptophyta). *J Phycol.* 2012;48: 635–646. doi:10.1111/j.1529-  
1187 8817.2012.01171.x
- 1188 50. Shang F. The response of fatty acids and pigments to variations in temperature and

- 1189 irradiance in the Marine Diatom *Thalassiosira pseudonana*. 2011.
- 1190 51. Devred E, Turpie K, Moses W, Klemas V, Moisan T, Babin M, et al. Future Retrievals of  
1191 Water Column Bio-Optical Properties using the Hyperspectral Infrared Imager (HyspIRI).  
1192 Remote Sens. 2013;5: 6812–6837. doi:10.3390/rs5126812
- 1193 52. Baird ME, Mongin M, Rizwi F, Bay LK, Cantin NE, Soja-Woźniak M, et al. A  
1194 mechanistic model of coral bleaching due to temperature-mediated light-driven reactive  
1195 oxygen build-up in zooxanthellae. Ecol Modell. 2018;386: 20–37.  
1196 doi:10.1016/j.ecolmodel.2018.07.013
- 1197 53. Finkel ZV. Light absorption and size scaling of light-limited metabolism in marine  
1198 diatoms. Limnol Oceanogr. 2001;46: 86–94. doi:10.4319/lo.2001.46.1.0086
- 1199 54. Stramski D, Sciandra A, Claustre H. Effects of temperature, nitrogen, and light limitation  
1200 on the optical properties of the marine diatom *Thalassiosira pseudonana*. Limnol  
1201 Oceanogr. 2002;47: 392–403. doi:10.4319/lo.2002.47.2.0392
- 1202 55. Sobrino C, Ward ML, Neale PJ. Acclimation to elevated carbon dioxide and ultraviolet  
1203 radiation in the diatom *Thalassiosira pseudonana*: Effects on growth, photosynthesis,  
1204 and spectral sensitivity of photoinhibition. Limnol Oceanogr. 2008;53: 494–505.  
1205 doi:10.4319/lo.2008.53.2.0494
- 1206 56. Li G, Campbell DA. Rising CO<sub>2</sub> Interacts with Growth Light and Growth Rate to Alter  
1207 Photosystem II Photoinactivation of the Coastal Diatom *Thalassiosira pseudonana*.  
1208 Subramanyam R, editor. PLoS One. 2013;8: e55562. doi:10.1371/journal.pone.0055562
- 1209 57. Campbell DA, Hossain Z, Cockshutt AM, Zhaxybayeva O, Wu H, Li G. Photosystem II  
1210 protein clearance and FtsH function in the diatom *Thalassiosira pseudonana*. Photosynth  
1211 Res. 2013;115: 43–54. doi:10.1007/s11120-013-9809-2

- 1212 58. Trimborn S, Wolf-Gladrow D, Richter K-U, Rost B. The effect of pCO<sub>2</sub> on carbon  
1213 acquisition and intracellular assimilation in four marine diatoms. *J Exp Mar Bio Ecol.*  
1214 2009;376: 26–36. doi:10.1016/j.jembe.2009.05.017
- 1215 59. Platt T, Gallegos C, Harrison W. Photoinhibition of photosynthesis in natural  
1216 assemblages. *J Mar Res.* 1980;38.
- 1217 60. Vedalankar P, Tripathy BC. Evolution of light-independent protochlorophyllide  
1218 oxidoreductase. *Protoplasma.* 2019;256: 293–312. doi:10.1007/s00709-018-1317-y
- 1219 61. Jallet D, Caballero MA, Gallina AA, Youngblood M, Peers G. Photosynthetic physiology  
1220 and biomass partitioning in the model diatom *Phaeodactylum tricornutum* grown in a  
1221 sinusoidal light regime. *Algal Res.* 2016;18: 51–60. doi:10.1016/j.algal.2016.05.014
- 1222 62. J. Geider R, Osborne BA, Raven JA. Light dependence of growth and photosynthesis in  
1223 *Phaeodactylum tricornutum* (Bacillariophyceae). *J Phycol.* 2004;21: 609–619.  
1224 doi:10.1111/j.0022-3646.1985.00609.x
- 1225 63. Brown MR, Dunstan GA, Norwood SJ, Miller KA. Effects of harvest stage and light on  
1226 the biochemical composition of the diatom *Thalassiosira pseudonana*. *J Phycol.* 1996;32:  
1227 64–73. doi:10.1111/j.0022-3646.1996.00064.x
- 1228 64. Hockin NL, Mock T, Mulholland F, Kopriva S, Malin G. The Response of Diatom Central  
1229 Carbon Metabolism to Nitrogen Starvation Is Different from That of Green Algae and  
1230 Higher Plants. *Plant Physiol.* 2012;158: 299–312. doi:10.1104/pp.111.184333
- 1231 65. Hunter JE. *Phytoplankton Lipidomics*: Lipid Dynamics in Response to Microalgal  
1232 Stressors . University of Southampton. 2015.
- 1233 66. Yu ET, Zendejas FJ, Lane PD, Gaucher S, Simmons BA, Lane TW. Triacylglycerol  
1234 accumulation and profiling in the model diatoms *Thalassiosira pseudonana* and

- 1235            *Phaeodactylum tricornutum* (Baccilariophyceae) during starvation. *J Appl Phycol.*  
1236            2009;21: 669–681. doi:10.1007/s10811-008-9400-y
- 1237    67.    Chiu H, Levy R, Borenstein E. Emergent Biosynthetic Capacity in Simple Microbial  
1238            Communities. Ouzounis CA, editor. *PLoS Comput Biol.* 2014;10: e1003695.  
1239            doi:10.1371/journal.pcbi.1003695
- 1240    68.    Noecker C, Chiu H-C, McNally CP, Borenstein E. Defining and Evaluating Microbial  
1241            Contributions to Metabolite Variation in Microbiome-Metabolome Association Studies.  
1242            *mSystems.* 2019;4: 1–28. doi:10.1128/msystems.00579-19
- 1243    69.    Cermeño P, Marañón E, Romero OE. Response of marine diatom communities to Late  
1244            Quaternary abrupt climate changes. *J Plankton Res.* 2013;35: 12–21.  
1245            doi:10.1093/plankt/fbs073
- 1246    70.    Yin K, Harrison PJ, Dortch Q. Lack of ammonium inhibition of nitrate uptake for a  
1247            diatom grown under low light conditions. *J Exp Mar Bio Ecol.* 1998;228: 151–165.  
1248            doi:10.1016/S0022-0981(98)00025-2
- 1249    71.    Perry MJ. Phosphate utilization by an oceanic diatom in phosphorus-limited chemostat  
1250            culture and in the oligotrophic waters of the central North Pacific1. *Limnol Oceanogr.*  
1251            1976;21: 88–107. doi:10.4319/lo.1976.21.1.0088
- 1252    72.    Dahlgren B. ChemPy: A package useful for chemistry written in Python. *J Open Source*  
1253            *Softw.* 2018;3: 565. doi:10.21105/joss.00565
- 1254    73.    Ahmad A, Tiwari A, Srivastava S. A Genome-Scale Metabolic Model of *Thalassiosira*  
1255            *pseudonana* CCMP 1335 for a Systems-Level Understanding of Its Metabolism and  
1256            Biotechnological Potential. *Microorganisms.* 2020;8: 1396.  
1257            doi:10.3390/microorganisms8091396



- 1258 74. Schober AF, Rio Bartulos C, Bischoff A, Lepetit B, Gruber A, Kroth PG. Organelle  
1259 Studies and Proteome Analyses of Mitochondria and Plastids Fractions from the Diatom  
1260 *Thalassiosira pseudonana*. *Plant Cell Physiol.* 2019;60: 1811–1828.  
1261 doi:10.1093/pcp/pcz097
- 1262 75. Helliwell KE, Wheeler GL, Leptos KC, Goldstein RE, Smith AG. Insights into the  
1263 Evolution of Vitamin B12 Auxotrophy from Sequenced Algal Genomes. *Mol Biol Evol.*  
1264 2011;28: 2921–2933. doi:10.1093/molbev/msr124
- 1265 76. Heal KR, Qin W, Ribalet F, Bertagnolli AD, Coyote-Maestas W, Hmelo LR, et al. Two  
1266 distinct pools of B12 analogs reveal community interdependencies in the ocean. *Proc Natl*  
1267 *Acad Sci.* 2017;114: 364–369. doi:10.1073/pnas.1608462114
- 1268 77. Durkin CA, Mock T, Armbrust EV. Chitin in Diatoms and Its Association with the Cell  
1269 Wall. *Eukaryot Cell.* 2009;8: 1038–1050. doi:10.1128/EC.00079-09
- 1270 78. Montsant A, Jabbari K, Maheswari U, Bowler C. Comparative Genomics of the Pennate  
1271 Diatom *Phaeodactylum tricornutum*. *Plant Physiol.* 2005;137: 500–513.  
1272 doi:10.1104/pp.104.052829
- 1273 79. Samukawa M, Shen C, Hopkinson BM, Matsuda Y. Localization of putative carbonic  
1274 anhydrases in the marine diatom, *Thalassiosira pseudonana*. *Photosynth Res.* 2014;121:  
1275 235–249. doi:10.1007/s11120-014-9967-x
- 1276 80. Durham BP, Sharma S, Luo H, Smith CB, Amin SA, Bender SJ, et al. Cryptic carbon and  
1277 sulfur cycling between surface ocean plankton. *Proc Natl Acad Sci.* 2015;112: 453–457.  
1278 doi:10.1073/pnas.1413137112
- 1279 81. Sarmiento H, Gasol JM. Use of phytoplankton-derived dissolved organic carbon by  
1280 different types of bacterioplankton. *Environ Microbiol.* 2012;14: 2348–2360.

- 1281           doi:10.1111/j.1462-2920.2012.02787.x
- 1282   82.   Chang RL, Ghamsari L, Manichaikul A, Hom EFY, Balaji S, Fu W, et al. Metabolic  
1283       network reconstruction of *Chlamydomonas* offers insight into light-driven algal  
1284       metabolism. *Mol Syst Biol*. 2011;7: 518. doi:10.1038/msb.2011.52
- 1285   83.   La Vars SM, Johnston MR, Hayles J, Gascooke JR, Brown MH, Leterme SC, et al.  
1286       <sup>29</sup>Si{1H} CP-MAS NMR comparison and ATR-FTIR spectroscopic analysis of the  
1287       diatoms *Chaetoceros muelleri* and *Thalassiosira pseudonana* grown at different salinities.  
1288       *Anal Bioanal Chem*. 2013;405: 3359–3365. doi:10.1007/s00216-013-6746-z
- 1289   84.   Claquin P, Kromkamp JC, Martin-Jezequel V. Relationship between photosynthetic  
1290       metabolism and cell cycle in a synchronized culture of the marine alga *Cylindrotheca*  
1291       *fusiformis* (Bacillariophyceae). *Eur J Phycol*. 2004;39: 33–41.  
1292       doi:10.1080/0967026032000157165
- 1293   85.   Thamatrakoln K, Hildebrand M. Silicon Uptake in Diatoms Revisited: A Model for  
1294       Saturable and Nonsaturable Uptake Kinetics and the Role of Silicon Transporters. *Plant*  
1295       *Physiol*. 2008;146: 1397–1407. doi:10.1104/pp.107.107094
- 1296   86.   Kliphuis AMJ, Klok AJ, Martens DE, Lamers PP, Janssen M, Wijffels RH. Metabolic  
1297       modeling of *Chlamydomonas reinhardtii*: energy requirements for photoautotrophic  
1298       growth and maintenance. *J Appl Phycol*. 2012;24: 253–266. doi:10.1007/s10811-011-  
1299       9674-3
- 1300   87.   Chalker BE, Dunlap WC, Oliver JK. Bathymetric adaptations of reef-building corals at  
1301       davies reef, great barrier reef, Australia. II. Light saturation curves for photosynthesis and  
1302       respiration. *J Exp Mar Bio Ecol*. 1983;73: 37–56. doi:10.1016/0022-0981(83)90004-7
- 1303   88.   Halsey KH, O'Malley RT, Graff JR, Milligan AJ, Behrenfeld MJ. A common partitioning

- 1304 strategy for photosynthetic products in evolutionarily distinct phytoplankton species. *New*  
1305 *Phytol.* 2013;198: 1030–1038. doi:10.1111/nph.12209
- 1306 89. Jordan DB, Ogren WL. Species variation in the specificity of ribulose biphosphate  
1307 carboxylase/oxygenase. *Nature.* 1981;291: 513–515. doi:10.1038/291513a0
- 1308 90. Young JN, Heureux AMC, Sharwood RE, Rickaby REM, Morel FMM, Whitney SM.  
1309 Large variation in the Rubisco kinetics of diatoms reveals diversity among their carbon-  
1310 concentrating mechanisms. *J Exp Bot.* 2016;67: 3445–3456. doi:10.1093/jxb/erw163
- 1311 91. Young JN, Hopkinson BM. The potential for co-evolution of CO<sub>2</sub>-concentrating  
1312 mechanisms and Rubisco in diatoms. *J Exp Bot.* 2017;68: 3751–3762.  
1313 doi:10.1093/jxb/erx130
- 1314 92. Heureux AMC, Young JN, Whitney SM, Eason-Hubbard MR, Lee RBY, Sharwood RE,  
1315 et al. The role of Rubisco kinetics and pyrenoid morphology in shaping the CCM of  
1316 haptophyte microalgae. *J Exp Bot.* 2017;68: 3959–3969. doi:10.1093/jxb/erx179
- 1317 93. Shuler M, Kargi F. Stoichiometry of Microbial growth and Product Formation. *Bioprocess*  
1318 *Eng.* 2002; 209–16.
- 1319 94. Peltier G, Cournac L. Chlororespiration. *Annu Rev Plant Biol.* 2002;53: 523–550.  
1320 doi:10.1146/annurev.arplant.53.100301.135242
- 1321 95. Grouneva I, Muth-Pawlak D, Battchikova N, Aro E-M. Changes in Relative Thylakoid  
1322 Protein Abundance Induced by Fluctuating Light in the Diatom *Thalassiosira pseudonana*.  
1323 *J Proteome Res.* 2016;15: 1649–1658. doi:10.1021/acs.jproteome.6b00124
- 1324 96. Cruz S, Goss R, Wilhelm C, Leegood R, Horton P, Jakob T. Impact of chlororespiration  
1325 on non-photochemical quenching of chlorophyll fluorescence and on the regulation of the  
1326 diadinoxanthin cycle in the diatom *Thalassiosira pseudonana*. *J Exp Bot.* 2011;62: 509–

- 1327 519. doi:10.1093/jxb/erq284
- 1328 97. Jakob T, Goss R, Wilhelm C. Activation of diadinoxanthin de-epoxidase due to a  
1329 chlororespiratory proton gradient in the dark in the diatom *Phaeodactylum tricornutum*.  
1330 *Plant Biol.* 1999;1: 76–82. doi:10.1111/j.1438-8677.1999.tb00711.x
- 1331 98. Davis A, Abbriano R, Smith SR, Hildebrand M. Clarification of Photorespiratory  
1332 Processes and the Role of Malic Enzyme in Diatoms. *Protist.* 2017;168: 134–153.  
1333 doi:10.1016/j.protis.2016.10.005
- 1334 99. Schnitzler Parker M, Armbrust EV, Piovia-Scott J, Keil RG. Induction of photorespiration  
1335 by light in the centric diatom *Thalassiosira weissflogii* (Bacillariophyceae): Molecular  
1336 characterization and physiological consequences. *J Phycol.* 2004;40: 557–567.  
1337 doi:10.1111/j.1529-8817.2004.03184.x
- 1338 100. Parker MS, Armbrust EV. Synergistic effects of light, temperature, and nitrogen source on  
1339 transcription of genes for carbon and nitrogen metabolism in the centric diatom  
1340 *Thalassiosira pseudonana* (Bacillariophyceae). *J Phycol.* 2005;41: 1142–1153.  
1341 doi:10.1111/j.1529-8817.2005.00139.x
- 1342 101. Turpin DH, Elrifi IR, Birch DG, Weger HG, Holmes JJ. Interactions between  
1343 photosynthesis, respiration, and nitrogen assimilation in microalgae. *Can J Bot.* 1988;66:  
1344 2083–2097. doi:10.1139/b88-286
- 1345 102. Bucciarelli E, Sunda WG. Influence of CO<sub>2</sub>, nitrate, phosphate, and silicate limitation on  
1346 intracellular dimethylsulfoniopropionate in batch cultures of the coastal diatom  
1347 *Thalassiosira pseudonana*. *Limnol Oceanogr.* 2003;48: 2256–2265.  
1348 doi:10.4319/lo.2003.48.6.2256
- 1349 103. Lomas MW. Ammonium release by nitrogen sufficient diatoms in response to rapid

- 1350 increases in irradiance. *J Plankton Res.* 2000;22: 2351–2366.
- 1351 doi:10.1093/plankt/22.12.2351
- 1352 104. Rosenwasser S, Graff van Creveld S, Schatz D, Malitsky S, Tzfadia O, Aharoni A, et al.
- 1353 Mapping the diatom redox-sensitive proteome provides insight into response to nitrogen
- 1354 stress in the marine environment. *Proc Natl Acad Sci.* 2014;111: 2740–2745.
- 1355 doi:10.1073/pnas.1319773111
- 1356 105. Emerson S, Hedges J. *Oceanography background: dissolved chemicals, circulation and*
- 1357 *biology in the sea. Chemical Oceanography and the Marine Carbon Cycle.* Cambridge:
- 1358 Cambridge University Press; 2008. pp. 3–32.
- 1359 106. Downing J. *Marine nitrogen: Phosphorus stoichiometry and the global N:P cycle.*
- 1360 *Biogeochemistry.* 1997;37: 237–252. doi:10.1023%2FA%3A1005712322036
- 1361 107. Karl D, Letelier R. Nitrogen fixation-enhanced carbon sequestration in low nitrate, low
- 1362 chlorophyll seascapes. *Mar Ecol Prog Ser.* 2008;364: 257–268. doi:10.3354/meps07547
- 1363 108. Moore CM, Mills MM, Arrigo KR, Berman-Frank I, Bopp L, Boyd PW, et al. Processes
- 1364 and patterns of oceanic nutrient limitation. *Nat Geosci.* 2013;6: 701–710.
- 1365 doi:10.1038/ngeo1765
- 1366 109. Heyer H, Krumbein WE. Excretion of fermentation products in dark and anaerobically
- 1367 incubated cyanobacteria. *Arch Microbiol.* 1991;155: 284–287. doi:10.1007/BF00252213
- 1368 110. Husic DW, Tolbert NE. Anaerobic formation of D-lactate and partial purification and
- 1369 characterization of a pyruvate reductase from *Chlamydomonas reinhardtii*. *Plant Physiol.*
- 1370 1985;78: 277–284. doi:10.1104/pp.78.2.277
- 1371 111. Husic DW, Tolbert NE. Inhibition of glycolate and D-lactate metabolism in a
- 1372 *Chlamydomonas reinhardtii* mutant deficient in mitochondrial respiration. *Proc Natl Acad*

- 1373 Sci. 1987;84: 1555–1559. doi:10.1073/pnas.84.6.1555
- 1374 112. Murik O, Tirichine L, Prihoda J, Thomas Y, Araújo WL, Allen AE, et al. Downregulation  
1375 of mitochondrial alternative oxidase affects chloroplast function, redox status and stress  
1376 response in a marine diatom. *New Phytol.* 2019;221: 1303–1316. doi:10.1111/nph.15479
- 1377 113. Basan M, Hui S, Okano H, Zhang Z, Shen Y, Williamson JR, et al. Overflow metabolism  
1378 in *Escherichia coli* results from efficient proteome allocation. *Nature.* 2015;528: 99–104.  
1379 doi:10.1038/nature15765
- 1380 114. Admiraal W, Peletier H, Laane RWPM. Nitrogen metabolism of marine planktonic  
1381 diatoms; excretion, assimilation and cellular pools of free amino acids in seven species  
1382 with different cell size. *J Exp Mar Bio Ecol.* 1986;98: 241–263. doi:10.1016/0022-  
1383 0981(86)90216-9
- 1384 115. Longnecker K, Kido Soule MC, Kujawinski EB. Dissolved organic matter produced by  
1385 *Thalassiosira pseudonana*. *Mar Chem.* 2015;168: 114–123.  
1386 doi:10.1016/j.marchem.2014.11.003
- 1387 116. Lau WWY, Armbrust E V. Detection of glycolate oxidase gene *glcD* diversity among  
1388 cultured and environmental marine bacteria. *Environ Microbiol.* 2006;8: 1688–1702.  
1389 doi:10.1111/j.1462-2920.2006.01092.x
- 1390 117. Lau WWY, Keil RG, Armbrust EV. Succession and Diel Transcriptional Response of the  
1391 Glycolate-Utilizing Component of the Bacterial Community during a Spring  
1392 Phytoplankton Bloom. *Appl Environ Microbiol.* 2007;73: 2440–2450.  
1393 doi:10.1128/AEM.01965-06
- 1394 118. Newton RJ, Griffin LE, Bowles KM, Meile C, Gifford S, Givens CE, et al. Genome  
1395 characteristics of a generalist marine bacterial lineage. *ISME J.* 2010;4: 784–798.

- 1396 doi:10.1038/ismej.2009.150
- 1397 119. Howard EC, Sun S, Biers EJ, Moran MA. Abundant and diverse bacteria involved in  
1398 DMSP degradation in marine surface waters. *Environ Microbiol.* 2008;10: 2397–2410.  
1399 doi:10.1111/j.1462-2920.2008.01665.x
- 1400 120. Teeling H, Fuchs BM, Becher D, Klockow C, Gardebrecht A, Bennke CM, et al.  
1401 Substrate-Controlled Succession of Marine Bacterioplankton Populations Induced by a  
1402 Phytoplankton Bloom. *Science* (80- ). 2012;336: 608–611. doi:10.1126/science.1218344
- 1403 121. Armbrust E V. The genome of the diatom *Thalassiosira Pseudonana*: Ecology, evolution,  
1404 and metabolism. *Science* (80- ). 2004;306: 79–86. doi:10.1126/science.1101156
- 1405 122. Dyrman ST, Jenkins BD, Rynearson TA, Saito MA, Mercier ML, Alexander H, et al.  
1406 The Transcriptome and Proteome of the Diatom *Thalassiosira pseudonana* Reveal a  
1407 Diverse Phosphorus Stress Response. Santos P, editor. *PLoS One.* 2012;7: e33768.  
1408 doi:10.1371/journal.pone.0033768
- 1409 123. Ashworth J, Coesel S, Lee A, Armbrust E V., Orellana M V., Baliga NS. Genome-wide  
1410 diel growth state transitions in the diatom *Thalassiosira pseudonana*. *Proc Natl Acad Sci.*  
1411 2013;110: 7518–7523. doi:10.1073/pnas.1300962110
- 1412 124. Valenzuela JJ, López García de Lomana A, Lee A, Armbrust E V., Orellana M V., Baliga  
1413 NS. Ocean acidification conditions increase resilience of marine diatoms. *Nat Commun.*  
1414 2018;9: 2328. doi:10.1038/s41467-018-04742-3
- 1415 125. Bender SJ, Durkin CA, Berthiaume CT, Morales RL, Armbrust EV. Transcriptional  
1416 responses of three model diatoms to nitrate limitation of growth. *Front Mar Sci.* 2014;1:  
1417 1–15. doi:10.3389/fmars.2014.00003
- 1418 126. Bertrand EM, McCrow JP, Moustafa A, Zheng H, McQuaid JB, Delmont TO, et al.

1419 Phytoplankton–bacterial interactions mediate micronutrient colimitation at the coastal  
1420 Antarctic sea ice edge. *Proc Natl Acad Sci.* 2015;112: 9938–9943.

1421 doi:10.1073/pnas.1501615112

1422 127. Sañudo-Wilhelmy SA, Gómez-Consarnau L, Suffridge C, Webb EA. The Role of B  
1423 Vitamins in Marine Biogeochemistry. *Ann Rev Mar Sci.* 2014;6: 339–367.

1424 doi:10.1146/annurev-marine-120710-100912

1425

### 1426 **Supporting information captions**

1427 **Table S1** Comparison of attributes of *iTps1432* and *P. tricornutum* GEMs

1428 **S1 Figure** Intersection between proteins enriched in the (a) mitochondria, (b) plastid, and (c) cell  
1429 lysate (Schober, *et al.*, 2019), subcellular protein localization pipeline predictions, and proteins  
1430 included in the model.

1431 **S2 Figure** Relationship between measured growth rate and optimal ATP utilization in *iTps1432*,  
1432 given the biomass composition at different light levels. The *x* error bars represent the 95%  
1433 confidence interval of measured dilution rates, and the *y* error bars follow from the 95%  
1434 confidence intervals of bulk biomass measurements (carbohydrates, protein, total dry weight, in  
1435 pg C/cell).

1436 **S3 Figure** Comparison of simulated biomass components versus target components at the onset  
1437 of different growth phases (days, 0, 1, 3, 7, 10). The best and worst (blue, red) estimates of  
1438 biomass composition were marked for each biomass component. (A) Bulk biomass components,  
1439 (B) RNA nucleotides, (C) Protein amino acids, (D) Free amino acids, (E) EPS sugars, (F)  
1440 Pigment molecules, (G) sulfolipids, (H) phosphatidylcholines, (I) phosphatidylethanolamines, (J)



- 1441 phosphatidylglycerols, (K) diacylglycerides, (L) monogalactosyldiacylglycerides, (M)
- 1442 digalactosyldiacylglycerides, (N) triacylglycerides, (O) mg chl *a* /gDW.
- 1443 **S1 Data Set** Table of reactions and metabolites and references in *iTps1432*. (XLS)
- 1444 **S2 Data Set** Biomass composition calculations and references for *Thalassiosira pseudonana*
- 1445 acclimated to 5, 60, and 200  $\mu\text{mol photons m}^{-2} \text{ s}^{-1}$ . (XLSX)
- 1446 **S3 Data Set** Constraint calculations and references for *Thalassiosira pseudonana*. (XLSX)
- 1447 **S4 Data Set** Biomass composition calculations and references for *Thalassiosira pseudonana*
- 1448 during nitrogen-starvation
- 1449 **S1 File** *iTps1432* acclimated to low light intensity (5  $\mu\text{mol photons m}^{-2} \text{ s}^{-1}$ ) in SBML format.
- 1450 Level 3, Version 1, fbc ver. 2. (XML)
- 1451 **S2 File** *iTps1432* acclimated to medium light intensity (60  $\mu\text{mol photons m}^{-2} \text{ s}^{-1}$ ) in SBML
- 1452 format. Level 3, Version 1, fbc ver. 2. (XML)
- 1453 **S3 File** *iTps1432* acclimated to high light intensity (200  $\mu\text{mol photons m}^{-2} \text{ s}^{-1}$ ) in SBML format.
- 1454 Level 3, Version 1, fbc ver. 2. (XML)
- 1455

**Table S1** Comparison of attributes of *iTps1432* and *P. tricornutum* GEMs

| Property          | <i>Thalassiosira pseudonana</i><br>CCMP 1335 | <i>Phaeodactylum tricornutum</i> CCAP 1055/1                                   |                                                            |
|-------------------|----------------------------------------------|--------------------------------------------------------------------------------|------------------------------------------------------------|
| <b>Model name</b> | <i>iTps1432</i>                              | <i>iLB1034</i> (Broddrick<br><i>et al.</i> , 2019)                             | <i>iLB1027_lipid</i><br>(Levering <i>et al.</i> ,<br>2016) |
| <b>Genes</b>      |                                              |                                                                                |                                                            |
|                   | <b>Total</b>                                 | 11,849 (Armbrust <i>et al.</i> , 2004)<br>13,344 (Gruber <i>et al.</i> , 2015) | 10,402 (Bowler <i>et al.</i> ,<br>2008)                    |
|                   | Included in models                           | 1,432 (12.09% / 10.73%)                                                        | 1,032 (9.92%)                                              |
|                   | Complexed <sup>a</sup>                       | 182                                                                            | 172                                                        |
| <b>Reactions</b>  |                                              |                                                                                |                                                            |
|                   | Reversible                                   | 633                                                                            | 423                                                        |
|                   | Irreversible                                 | 5,446                                                                          | 1,739                                                      |
|                   | Gene associated                              | 5,578                                                                          | 1,861                                                      |

|                        |       |       |       |
|------------------------|-------|-------|-------|
| Non-gene associated    | 501   | 301   | 306   |
| Metabolic              | 5,553 | 1,801 | 4,093 |
| Transport              | 432   | 297   | 308   |
| Demand <sup>b</sup>    | 3     | 16    | 13    |
| Sink <sup>c</sup>      | 1     | 1     | 1     |
| Exchange <sup>d</sup>  | 72    | 30    | 30    |
| Biomass                | 16    | 13    | 8     |
| Extracellular          | 126   | 51    | 51    |
| Cytoplasm              | 4,365 | 994   | 3,078 |
| Plastid                | 900   | 441   | 657   |
| Thylakoid lumen        | 12    | 7     | 7     |
| Mitochondria           | 531   | 530   | 525   |
| Peroxisome             | 145   | 138   | 138   |
| <b>Total</b>           | 6,079 | 2,162 | 4,456 |
| Unique                 | 5,627 | 1,869 | 4,130 |
| Blocked <sup>e</sup>   | 545   | 487   | 381   |
| Orphaned <sup>f</sup>  | 0     | 4     | 4     |
| <b>Metabolites</b>     |       |       |       |
| Extracellular          | 73    | 30    | 30    |
| Cytoplasm              | 1,520 | 713   | 1,130 |
| Plastid                | 566   | 384   | 428   |
| Thylakoid lumen        | 15    | 9     | 9     |
| Mitochondria           | 477   | 447   | 443   |
| Peroxisome             | 141   | 131   | 132   |
| <b>Total</b>           | 2,792 | 1,714 | 2,172 |
| Unique                 | 2,007 | 1,153 | 1,583 |
| Dead-ends <sup>g</sup> | 425   | 446   | 340   |

1456 <sup>a</sup> Complexed genes are those that together encode multiple subunits of an enzyme. They are  
 1457 denoted as complexes in the gene reaction rules using the word ‘and’, while genes performing  
 1458 the same reaction are connected by the word ‘or’.

1459 <sup>b</sup> Demand reactions are unbalanced reactions (have substrates but no products). These reactions  
 1460 deal with metabolites that are known to be produced (and not consumed) but have no  
 1461 degradation pathway, are not substrates in the biomass reaction, and are not known to be  
 1462 transported out of the cell, for example loss of photons (as heat or fluorescence).

1463 <sup>c</sup> Sink reactions are similar to demand reactions but are reversible. These reactions are a source  
 1464 and sink for metabolites that are required by the model but are not part of the extracellular  
 1465 environment, for example a protein-linked asparagine residue required for N-glycosylation.

1466 <sup>d</sup> Exchange reactions are unbalanced extracellular reactions that are used to control the supply or  
 1467 removal of metabolites in the media.

1468 <sup>e</sup> Blocked reactions are reactions that cannot carry flux due to missing reactions in the network.

1469 <sup>f</sup> Orphaned reactions are blocked reactions that are disconnected from the entire network.

1470 <sup>g</sup> Dead-end metabolites are metabolites that are only linked to blocked reactions.

1471

1472 **Supplementary references**

- 1473 Armbrust E V. The Genome of the Diatom *Thalassiosira Pseudonana*: Ecology, Evolution, and  
1474 Metabolism. *Science* (80- ). 2004;306: 79–86. doi:10.1126/science.1101156
- 1475 Bowler C, Allen AE, Badger JH, Grimwood J, Jabbari K, Kuo A, et al. The *Phaeodactylum*  
1476 genome reveals the evolutionary history of diatom genomes. *Nature*. 2008;456: 239–244.  
1477 doi:10.1038/nature07410
- 1478 Broddrick JT, Du N, Smith SR, Tsuji Y, Jallet D, Ware MA, et al. Cross-compartment  
1479 metabolic coupling enables flexible photoprotective mechanisms in the diatom  
1480 *Phaeodactylum tricornutum*. *New Phytol*. 2019;222: 1364–1379. doi:10.1111/nph.15685
- 1481 Gruber A, Rocap G, Kroth PG, Armbrust EV, Mock T. Plastid proteome prediction for diatoms  
1482 and other algae with secondary plastids of the red lineage. *Plant J*. 2015;81: 519–528.  
1483 doi:10.1111/tpj.12734
- 1484 Levering J, Broddrick J, Dupont CL, Peers G, Beerli K, Mayers J, et al. Genome-Scale Model  
1485 Reveals Metabolic Basis of Biomass Partitioning in a Model Diatom. Ianora A, editor.  
1486 *PLoS One*. 2016;11: e0155038. doi:10.1371/journal.pone.0155038
- 1487 Schober AF, Río Bártulos C, Bischoff A, Lepetit B, Gruber A, Kroth PG. Organelle Studies and  
1488 Proteome Analyses of Mitochondria and Plastids Fractions from the Diatom *Thalassiosira*  
1489 *pseudonana*. *Plant Cell Physiol*. 2019;60: 1811–1828. doi:10.1093/pcp/pcz097
- 1490

mitochondria

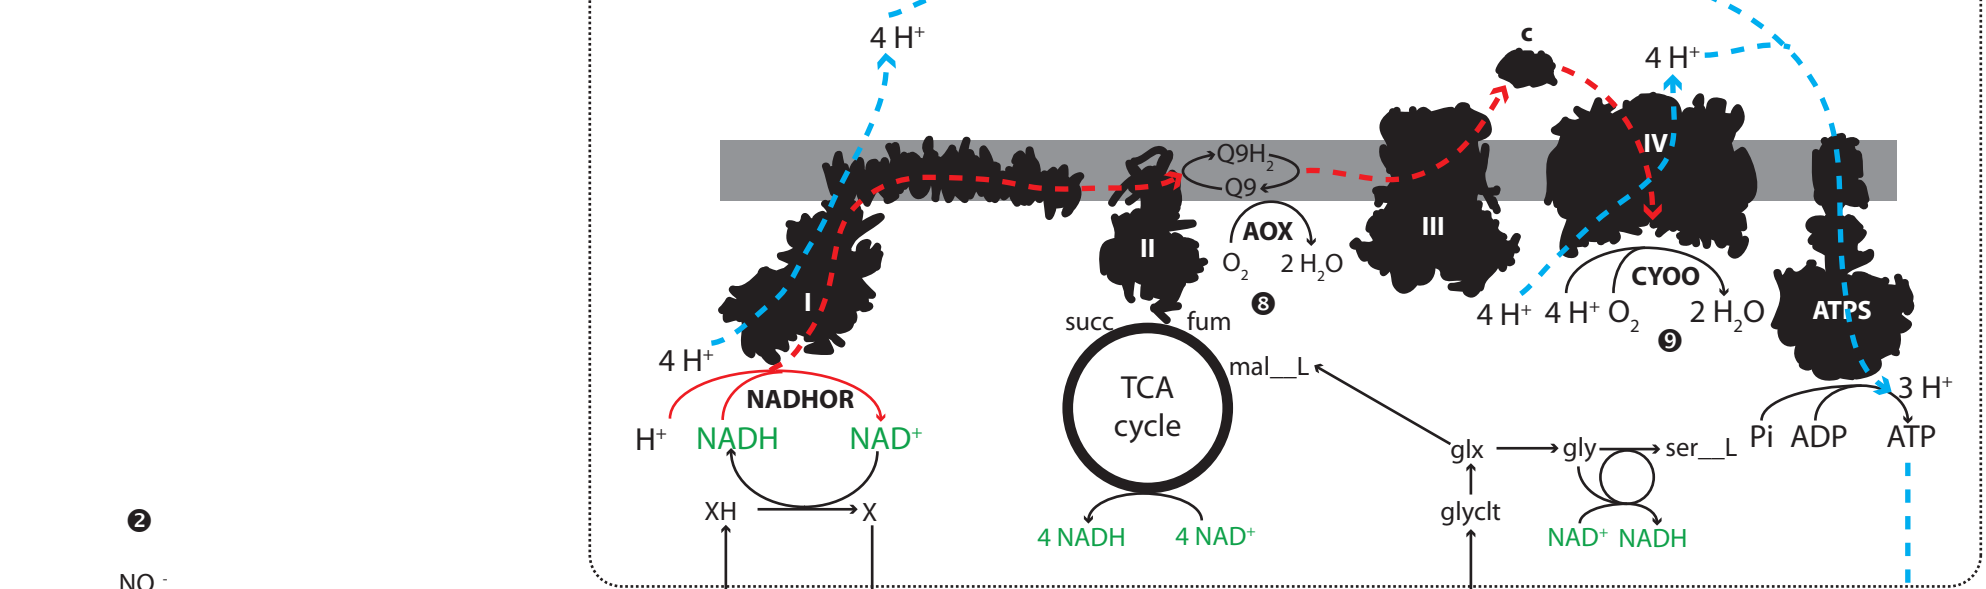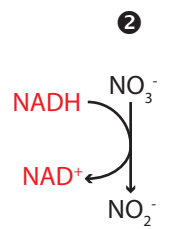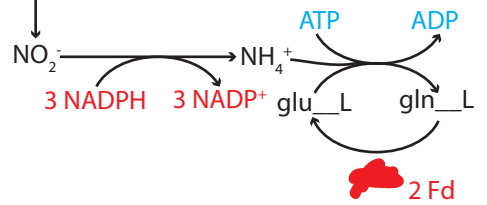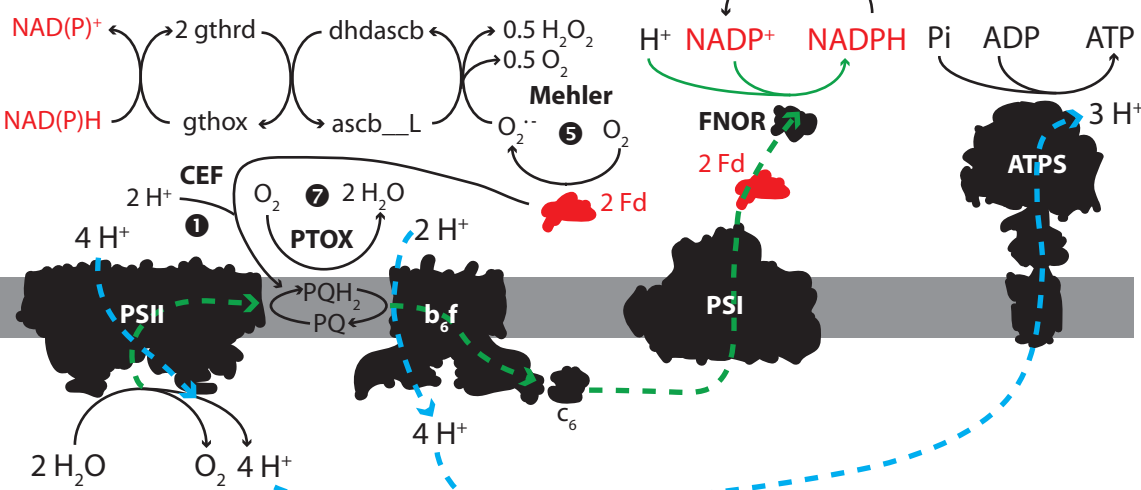

ATP

plastid

## Pigments

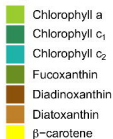

## Components

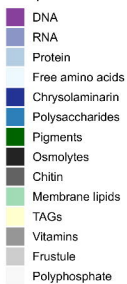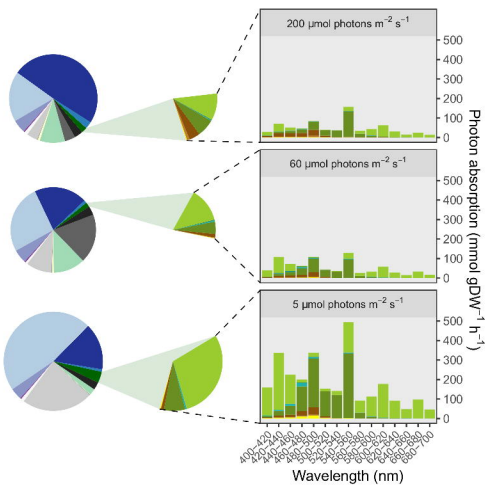

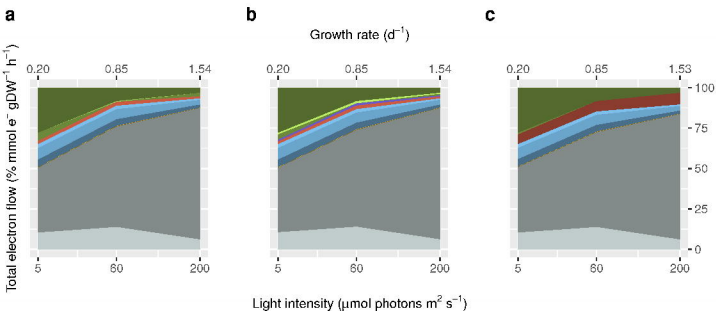

**Plastid respiration**

- CEF
- RuBP oxygenase
- Plastid terminal oxidase
- Mehler reaction

**Peroxisomal respiration**

- Glycolate oxidase (x)

**Mitochondrial respiration**

- Glycolate oxidase (m)
- Cytochrome c oxidase
- Alternative oxidase

**N assimilation**

- NO<sub>3</sub> reductase
- NO<sub>2</sub> reductase
- Glutamate synthase

**S assimilation**

- APS reductase
- PAPS reductase
- 2-Aminoacrylate sulfotransferase
- SO<sub>3</sub> reductase

**Biomass production**

- Biosynthesis of complex macromolecules
- G3P production

**a**Target biomass  
composition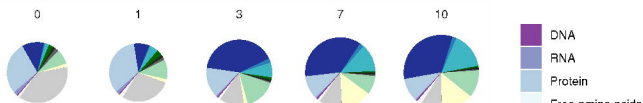**b**N ( $\text{mmol L}^{-1}$ )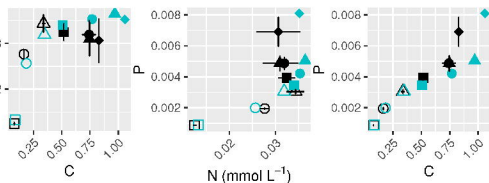

Days in "N-free" media □ 0 ○ 1 △ 2 ■ 3 ● 5 ▲ 7 ◆ 10

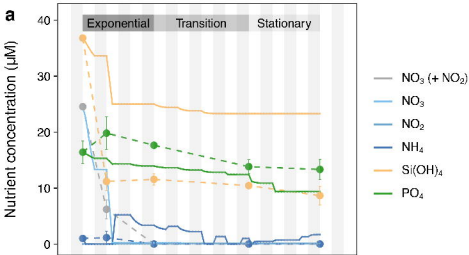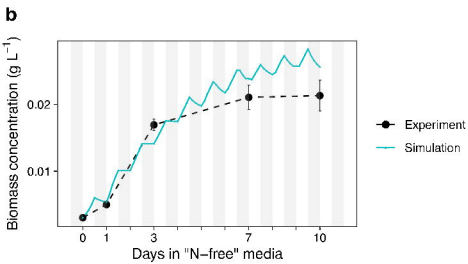



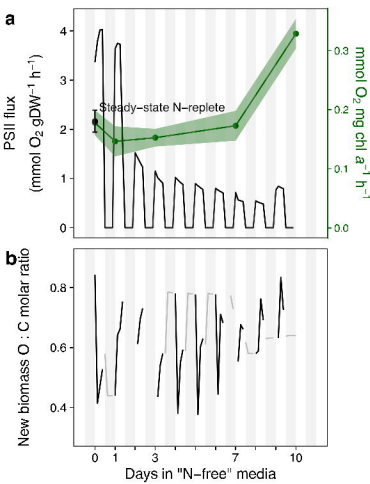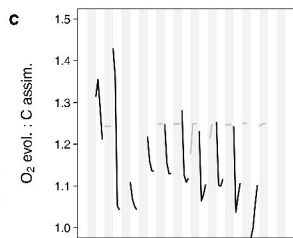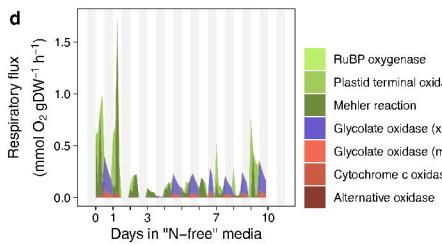

■ CHO   
 ■ CHOS   
 ■ CHNO   
 ■ Inorganic

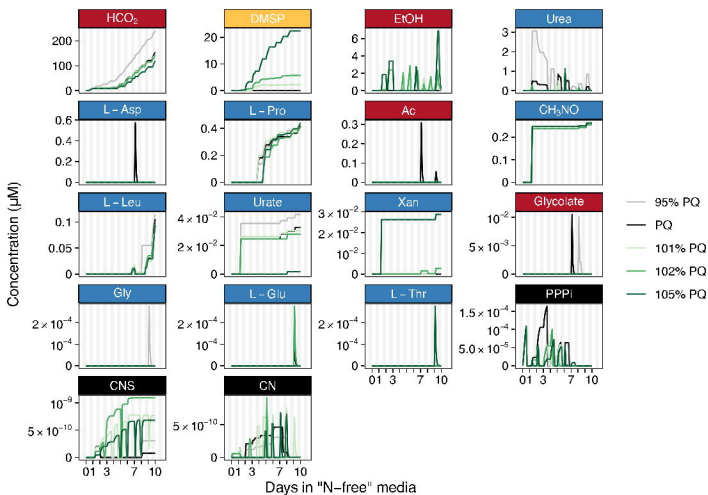

Source: https://www.biorxiv.org/content/10.1101/2020.10.26.355578v1.full.pdf
